# Supplementary material for: Arabidopsis Mitochondrial Transcription Termination Factor mTERF2 Promotes Splicing of Group IIB Introns
Source: MDPI journal article supplement (doi:10.3390/cells10020315), 2021-02-03
Supplement: s1 [file s1]

**Supplementary Table S1.** Primers used in this study.

| Atg number                                       | Description                                                              | Primer sequence (from 5' to 3')                                                                                                 |
|--------------------------------------------------|--------------------------------------------------------------------------|---------------------------------------------------------------------------------------------------------------------------------|
| <b>Genotyping</b>                                |                                                                          |                                                                                                                                 |
| <i>AT2G21710</i>                                 | <i>mterf2-1</i> RP1                                                      | GCGCTTTAACTATCATCTCCCTC                                                                                                         |
|                                                  | <i>mterf2-1</i> LP1                                                      | GCTACTACACCTCAACGTTTTCC                                                                                                         |
|                                                  | <i>mterf2-2</i> RP2                                                      | TGAGTATCTAGAGAGCAATGGTGTG                                                                                                       |
|                                                  | <i>mterf2-2</i> LP2                                                      | TGACTAGAGGCTTCCATCTTTCT                                                                                                         |
|                                                  | <i>mterf2-3</i> RP3                                                      | GGAAATCAGCAATCATTTCCGCT                                                                                                         |
|                                                  | <i>mterf2-3</i> LP3                                                      | TTGCAGGAGATGGGTATCCCTAA                                                                                                         |
| <b>Fluorescence localization</b>                 |                                                                          |                                                                                                                                 |
| <i>AT2G21710</i>                                 | <i>mTERF2.1</i> cDNA amplified with attB1 and attB2 overhangs            | GGGGACAAGTTTGTACAAAAAAGCAGG<br>CTATGCTTCTCCACTGCAACGT<br>GGGGACCACTTTGTACAAGAAAGCTGG<br>GTGTTCTGTCAAATCCTCTTCT                  |
| <b>GUS promoter assay</b>                        |                                                                          |                                                                                                                                 |
| <i>AT2G21710</i>                                 | <i>mTERF2.1</i> promoter region amplified with attB1 and attB2 overhangs | GGGGACAAGTTTGTACAAAAAAGCAGG<br>CTAAGTTATTTCTGTCTGCTTTTA<br><br>GGGGACCACTTTGTACAAGAAAGCTGG<br>GTGTTTAGAGCAACGTTGTCTGGAGAGA<br>A |
| <b>Artificial microRNA (amiRNA) construction</b> |                                                                          |                                                                                                                                 |
| <i>mterf2-amiR1</i>                              | I:                                                                       | gaTTACTGTATCTTGTGAATCGGtctctctttgt<br>attcc                                                                                     |
|                                                  | II:                                                                      | gaCCGATTCACAAGATACAGTAAtcaaaga<br>gaatcaatga                                                                                    |
|                                                  | III:                                                                     | gaCCAATTCACAAGAAACAGTATtcacaggt<br>cgtgatatg                                                                                    |
|                                                  | IV:                                                                      | gaATACTGTTTCTTGTGAATTGGtctacatatat<br>attcct                                                                                    |
| <i>mterf2-amiR2</i>                              | I:                                                                       | gaTTTAGGTCTCGATTATCGCGGtctctctttgt<br>tattcc                                                                                    |
|                                                  | II:                                                                      | gaCCGCGATAATCGAGACCTAAAtcaaaga<br>gaatcaatga                                                                                    |
|                                                  | III:                                                                     | gaCCACGATAATCGACACCTAATtcacaggt<br>cgtgatatg                                                                                    |
|                                                  | IV:                                                                      | gaATTAGGTGTCGATTATCGTGGtctacatatat<br>tattcct                                                                                   |
| pDONR207-amiR                                    | A:                                                                       | GGGGACAAGTTTGTACAAAAAAGCAGG<br>CTCAAACACACGCTCGGACG                                                                             |
|                                                  | B:                                                                       | GGGGACCACTTTGTACAAGAAAGCTGG<br>GTCATGGCGATGCCTTAAATA                                                                            |
| <i>mTERF2</i> RT-PCR and real-time               |                                                                          | TGGTTAGGAAAGGTAGATTTGGGA<br>TGCTTCAACCACCTTACAAGA                                                                               |
| <b>Real-time PCR</b>                             |                                                                          |                                                                                                                                 |
| <i>AT4G36800</i>                                 | "Housekeeping" gene RCE1                                                 | CTGTTACGGAACCCAATTC<br>GGAAAAAGGTCTGACCGACA                                                                                     |

|                              |                              |                                                   |
|------------------------------|------------------------------|---------------------------------------------------|
| AT3G45140                    | LOX2                         | ATTCAAAGGCAAGCTCCAAT<br>AACACCCATTCCGGTAACAC      |
| AT1G72520                    | LOX4                         | CCGTCATCACCACCATCATCTG<br>CGTAGCCACCGTAAGGATATTGT |
| AT3G49620                    | DIN11                        | TGGATCACCTTATGAGTTTGAG<br>CGTCAACAAGCCATAGTCAG    |
| AT3G27690                    | BBX29                        | CTGTGAGTCTTGTTTAGCTCGT<br>GTTCTCCTCATCGGAGAGGT    |
| ATCG00065                    | <i>rps12</i> exon1           | ATCCGAAACGTCACGAAATC                              |
| ATCG00905/<br>ATCG01230      | <i>rps12</i> intron1b        | TCTCACACCGGGTAAATCCT                              |
| ATCG00905/<br>ATCG01230      | <i>rps12</i> exon2           | GGAGCCGTATGAGGTGAAAA                              |
| ATCG00905/<br>ATCG01230      | <i>rps12</i> exon2           | CGTAAAGTTGCCAGAGTACGA                             |
| ATCG00905/<br>ATCG01230      | <i>rps12</i> intron 2        | TTTGGCTTTTTGACCCCATATA                            |
| ATCG00905/<br>ATCG01230      | <i>rps12</i> exon 3          | TGTGGAAAGCCGTATTCGAT                              |
| ATCG00180                    | <i>rpoC1</i> exon 1          | ATGGTATTTGAAACGTCTTCCTAG                          |
| ATCG00180                    | <i>rpoC1</i> exon 2          | ATTCAAATGAACCTCGTAATCGTAA                         |
| ATCG00180                    | <i>rpoC1</i> intron 1        | AACTACTTGAGCCGGATGAGA                             |
| ATCG00180                    | read-thr_ <i>rpoC1</i> -1_F  | GTGGAAGGACGCACTATTT                               |
| ATCG00180                    | read-thr_ <i>rpoC1</i> -1_R  | TCTCCAATAFCTGGAGATAAG                             |
| ATCG00180                    | read-thr_ <i>rpoC1</i> -2_F  | GAACCACAGTTGGTCATATTTTC                           |
| ATCG00180                    | read-thr_ <i>rpoC1</i> -2_R  | GGGTGTCCTAGAATTTCCTTT                             |
| ATCG00180                    | read-thr_ <i>rpoC1</i> -3_F  | CTCAAACCTATTGTGCGAATCC                            |
| ATCG00180                    | read-thr_ <i>rpoC1</i> -3_R  | CCATCCCGAAGTGATCTATT                              |
| <b>RNA gel blot analysis</b> |                              |                                                   |
| ATCG00270                    | <i>psbD</i>                  | ATGACTATAGCCCTTGGTAA<br>AACCAGATTGACCTAGTGGA      |
| ATCG00350                    | <i>psaA</i>                  | TGGGCTAAACCCGGTCATTT<br>GGAACCAACCAGCAAAAAGC      |
| ATCG00480                    | <i>ATP<math>\beta</math></i> | TTAGGTCCTGTCGATACTCG<br>ACCCAATAAGGCGGATACCT      |
| ATCG00490                    | <i>rbcL</i>                  | CGTTGGAGAGACCGTTTCTT<br>CAAAGCCCCAAAGTTGACTCC     |
| AT5G38410                    | <i>rbcS</i>                  | ATGGCTTCCTCTATGCTCTCTC<br>AATGAAGGCGCCCGGGTACTCC  |
| AT1G29910                    | <i>LHCB1.2</i>               | ATGGCCGCCTCCACAATGGCT<br>CCTCGGCCTCTCCCAACGGCC    |
| ATCG00920                    | <i>rrn16S</i>                | TTTAAGTCCGCGTCAAATC<br>TCAACGGTGGCAACTAAACA       |
| ATCG00950                    | <i>rrn23S</i>                | TAATACGACTCACTATAGGGAGATTCA<br>AACGAGGAAAGGCTTACG |
| ATCG00960                    | <i>rrn4.5S</i>               | AGGAGAGCACTCATCTTGG<br>GATGCCTCAGCTGCATACACTGCAC  |

|                         |                               |                                                                                                                                                       |
|-------------------------|-------------------------------|-------------------------------------------------------------------------------------------------------------------------------------------------------|
| ATCG00970               | <i>rrn5S</i>                  | TTCCACTTGACACCTATCGTAATGATAA<br>ACGGCTCGTCTCGCCGTGACCTTC<br>CCTGGCGTCGAGCTATTTTTCCGCAGGA<br>CCTCCCCTACAGTATCGTCACCGCAGTA<br>GAGTTTAACCAACCAAGTTCGGGAT |
| ATCG00930               | <i>trnI.2/3</i> , second exon | ATTTGAACCAGAGACCTCGC                                                                                                                                  |
| ATCG00930               | <i>trnI.2/3</i> , intron      | CCCAGGCACAACGACGCAA                                                                                                                                   |
| ATCG00940               | <i>trnA.1</i>                 | GAGCGGAGCTCTACCAACTG                                                                                                                                  |
| ATCG00065               | <i>rps12</i> exon1            | ATGCCAACCATTAAACAACCT<br>ATACACCCGAGTACATGTTC                                                                                                         |
| ATCG00065               | <i>rps12</i> intron1a         | GTGCGACTCGTTTAGATCATAG<br>TCGTGTAAGCCGTGAATGAG                                                                                                        |
| ATCG00905/<br>ATCG01230 | <i>rps12</i> exon2            | ACTATCACCCCCAAAAAACC<br>AACGCCCTTGTTGACGATCC                                                                                                          |
| ATCG00905/<br>ATCG01230 | <i>rps12</i> intron1b         | ATAACCGCATGGATAAGCTC<br>AGATAAGTCACCCTTACTGC                                                                                                          |
| ATCG00360               | <i>ycf3</i> exon2             | CGGATGTGGCTCAATCTGAAGG<br>AGGGGTTTCGTTCTAATGCCCGA                                                                                                     |
| ATCG00360               | <i>ycf3</i> intron1           | AGGGGAAGAAGCACTACGCCG<br>ACGGCTCCTCCTTTAGGTGCAT                                                                                                       |
| ATCG01100               | <i>ndhA</i> exon1             | ATTGGACCTGAATACGCCGG<br>AGGAGCAATACTTGAGATGGCA                                                                                                        |
| ATCG01100               | <i>ndhA</i> intron            | CGATTCAGAGTATGCTCCTATCCACCGA<br>C                                                                                                                     |
| ATCG00180               | <i>rpoC1</i> exon2            | CAGAACCGTACATGAGGTCTTGGC<br>TTTTCTTTTGCTAGGCCCATAACT                                                                                                  |
| ATCG00180               | <i>rpoC1</i> intron           | TTAGGTATCATATGAACAGG<br>TGTGATTTGATCGAAAT<br>ATTGGGATAGGGTCCACT                                                                                       |
