# Supplementary material for: Arabidopsis Mitochondrial Transcription Termination Factor mTERF2 Promotes Splicing of Group IIB Introns
Source: Cells. 2021 Feb 3;10(2):315. doi: 10.3390/cells10020315 (PMC7913559; doi:10.3390/cells10020315)
Supplement: Supplementary file 1 [file cells-10-00315-s001.zip › Supplementary Table S2.xlsx]

## Sheet: Legend
Supplementary Table S2. Enrichment values of the RIP (RNA-immunoprecipitation)-Seq experiment.

## Sheet: All data
Gene Model Name	Fold change mTERF2/RBP	p-adj	mTERF2_1	mTERF2_2	mTERF2_3	control_1	control_2	control_3	Gene Model Description	Primary Gene Symbol	Intron classification	Comment
ATCG01200:exon:1	1486.89	7.43e-231	18681	15948.1	24209.5	6.89281	15.7364	14.4169	tRNA-Ile	(TRNI.3)	group IIA	Nothing special in IGV, Northern
ATCG00940:exon:2	825.601	3.54e-38	927.127	391.668	943.67	0	1.52288	0.497136	tRNA-Ala	(TRNA.1)	group IIA	Nothing special in IGV, Northern
ATCG00930:exon:2	324.208	1.66e-15	249.487	853.672	759.879	0	0.507626	3.47995	tRNA-Ile	(TRNI.2)	group IIA	Nothing special in IGV, Northern
ATCG00960:exon:1	232.754	9.61e-34	21066.4	3661.55	23820.3	71.2258	44.1635	69.599	Chloroplast-encoded 4.5S ribosomal RNA, which is a constituent of the 50S large subunit of plastidic ribosome.	RIBOSOMAL RNA4.5S (RRN4.5S.1)	#N/A	Northern
ATCG01230:exon:1	222.656	1.25e-20	109.453	104.813	552.92	1.53174	1.52288	0	chloroplast gene encoding ribosomal protein s12. The gene is located in three distinct loci on the chloroplast genome and is transpliced to make one transcript.	RIBOSOMAL PROTEIN S12B (RPS12B)	group IIA	IGV: higher accumulation, especially first intron and upstream
ATCG01310:exon:1	194.067	1.06e-06	37.0207	38.6152	199.236	0.765868	0	0	encodes a chloroplast ribosomal protein L2, a constituent of the large subunit of the ribosomal complex	RIBOSOMAL PROTEIN L2 (RPL2.2)	group IIA	IGV: nothing special, but nice RIP data around intron
ATCG00940:exon:1	188.435	1.81e-55	7210.99	6007.42	5380.93	15.3174	20.8127	55.6792	tRNA-Ala	(TRNA.1)	group IIA	.
ATCG00065:exon:1	182.343	1.57e-190	13828	10884	15667.1	79.6503	53.8084	84.5131	chloroplast gene encoding ribosomal protein s12. The gene is located in three distinct loci on the chloroplast genome and is transpliced to make one transcript.	RIBOSOMAL PROTEIN S12A (RPS12A)	group IIB	no intron. But trans-splicing, IGV: interesting, like read-through
ATCG00400:exon:2	159.3	2.65e-152	11851.5	9397.28	14148.9	49.7814	97.9718	68.6048	tRNA-Leu	(TRNL.1)	group I	IGV: higher accumulation in mterf2,
ATCG00905:exon:1	158.133	5.35e-19	394.351	286.856	957.571	3.82934	2.0305	2.98282	chloroplast gene encoding ribosomal protein s12. The gene is located in three distinct loci on the chloroplast genome and is transpliced to make one transcript.	RIBOSOMAL PROTEIN S12C (RPS12C)	group IIA	IGV: no splicing defect, but higher accumulation
ATCG00905:exon:2	155.349	2.12e-06	11.2672	26.2032	46.3341	0	0	0	chloroplast gene encoding ribosomal protein s12. The gene is located in three distinct loci on the chloroplast genome and is transpliced to make one transcript.	RIBOSOMAL PROTEIN S12C (RPS12C)	group IIA
ATCG01190:exon:1	153.824	2.45e-14	5921.7	6353.58	3319.06	4.59521	24.366	51.205	tRNA-Ala	(TRNA.2)	group IIA	.
ATCG00930:exon:1	142.395	1.87e-140	9601.24	5017.22	8545.55	52.079	61.4227	45.7365	tRNA-Ile	(TRNI.2)	group IIA	.
ATCG01150:exon:1	142.099	1.45e-06	25.7535	26.2032	29.3449	0	0	0	tRNA-Arg	(TRNR.3)	#N/A	.
ATCG00400:exon:1	139.111	3.29e-216	35238.9	27838.8	35746.7	247.375	264.981	188.912	tRNA-Leu	(TRNL.1)	group I	.
ATMG00280:exon:1	137.175	1.8e-30	709.832	507.514	1383.84	9.19042	3.55338	4.97136	Ribulose bisphosphate carboxylase large chain, catalytic domain; FUNCTIONS IN: ribulose-bisphosphate carboxylase activity, magnesium ion binding; INVOLVED IN: carbon fixation; LOCATED IN: plastid; CONTAINS InterPro DOMAIN/s: Ribulose bisphosphate carboxylase, large subunit, C-terminal (InterPro:IPR000685); BEST Arabidopsis thaliana protein match is: Ribulose bisphosphate carboxylase large chain, …	(ORF110A)	#N/A	.
ATCG01200:exon:2	136.347	6.74e-57	605.208	433.042	577.631	4.59521	4.56863	2.48568	tRNA-Ile	(TRNI.3)	group IIA	.
ATCG01100:exon:2	132.831	8.64e-226	25924.1	19704.8	26016.6	188.404	176.146	168.529	NADH dehydrogenase ND1	(NDHA)	group IIB	IGV: splicing defect, good RIP data
ATCG00360:exon:2	131.783	8.65e-197	12271.6	9035.96	12351.1	86.5431	91.8803	73.5761	Encodes a protein required for photosystem I assembly and stability. In Chlamydomonas reinhardtii, this protein seems to act as a PSI specific chaperone facilitating the assembly of the complex by interacting with PsaA and PsaD. A loss of function mutation in tobacco leads to a loss of photosystem I.	(YCF3)	group IIB	IGV: first intron splicing defect
ATCG00750:exon:1	130.889	1.49e-158	12192.7	9251.1	12752.7	63.5671	95.4337	96.4444	30S chloroplast ribosomal protein S11	RIBOSOMAL PROTEIN S11 (RPS11)	#N/A	.
ATCG01310:exon:2	110.758	7.44e-06	148.083	73.0931	1434.81	0	2.53813	6.46277	encodes a chloroplast ribosomal protein L2, a constituent of the large subunit of the ribosomal complex	RIBOSOMAL PROTEIN L2 (RPL2.2)	group IIA	IGV: nothing special, but nice RIP data around intron
ATCG00830:exon:2	105.813	2.49e-17	291.337	158.598	1030.16	4.59521	4.06101	3.47995	encodes a chloroplast ribosomal protein L2, a constituent of the large subunit of the ribosomal complex	RIBOSOMAL PROTEIN L2 (RPL2.1)	group IIA	IGV: splicing also in WT not so nicely seen, like WT
ATCG01170:exon:1	102.911	3.38e-166	9926.38	8761.51	12624.5	108.753	109.647	82.0274	chloroplast-encoded 4.5S ribosomal RNA, which is part of the 50S large ribosomal subunit in plastids	RIBOSOMAL RNA4.5S (RRN4.5S.2)	#N/A	.
ATCG00360:exon:1	96.0342	3.72e-153	13135.9	9769.64	14162.8	127.134	147.212	105.89	Encodes a protein required for photosystem I assembly and stability. In Chlamydomonas reinhardtii, this protein seems to act as a PSI specific chaperone facilitating the assembly of the complex by interacting with PsaA and PsaD. A loss of function mutation in tobacco leads to a loss of photosystem I.	(YCF3)	group IIB	IGV: first intron splicing defect
ATCG00670:exon:2	90.5279	2.14e-156	13396.7	9764.13	14318.8	134.027	150.765	123.29	Encodes the only ClpP (caseinolytic protease) encoded within the plastid genome. Contains a highly conserved catalytic triad of Ser-type proteases (Ser-His-Asp). Part of the 350 kDa chloroplast Clp complex. The name reflects nomenclature described in Adam et. al (2001).	PLASTID-ENCODED CLP P (PCLPP)	group IIA	IGV: splicing OK, but carefully look downstream (ATCG0065, RPS12A), there also good RIP
ATCG01190:exon:2	90.0056	7.79e-77	751.681	1099.15	898.881	11.488	9.13727	9.44558	tRNA-Ala	(TRNA.2)	group IIA	.
ATCG00970:exon:1	87.9047	5.81e-13	1194.32	500.618	5495.22	16.8491	34.0109	17.3998	chloroplast-encoded 5S ribosomal RNA	RIBOSOMAL RNA5S (RRN5S)	#N/A	.
ATCG00720:exon:1	87.806	1.87e-173	9287.37	7961.63	9884.6	100.329	118.277	86.5017	Encodes the cytochrome b(6) subunit of the cytochrome b6f complex.	PHOTOSYNTHETIC ELECTRON TRANSFER B (PETB)	group IIB	IGV: splicing OK
ATCG01100:exon:1	79.1883	8.38e-152	10719.9	8313.3	11999	128.666	145.181	112.85	NADH dehydrogenase ND1	(NDHA)	group IIB	IGV: splicing defect, good RIP data
ATCG00100:exon:2	76.6615	2.19e-136	21713.4	18063.6	22797.9	274.181	306.098	224.208	tRNA-Gly	(TRNG.1)	group IIB	IGV: nothing special
ATCG00710:exon:1	76.4378	3.38e-166	14829.2	11410.8	15441.6	199.126	187.314	153.118	Encodes a 8 kD phosphoprotein that is a component of the photosystem II oxygen evolving core. Its exact molecular function has not been determined but it may play a role in mediating electron transfer between the secondary quinone acceptors, QA and QB, associated with the acceptor side of PSII.	PHOTOSYSTEM II REACTION CENTER PROTEIN H (PSBH)	#N/A	.
ATCG00450:exon:2	72.5519	8.87e-132	5405.02	4155.27	5998.72	63.5671	80.7125	66.6162	tRNA-Val	(TRNV.1)	group IIA	.
ATCG00730:exon:1	70.8496	6.32e-134	4637.25	3485.02	4781.68	61.2695	52.7931	65.622	A chloroplast gene encoding subunit IV of the cytochrome b6/f complex	PHOTOSYNTHETIC ELECTRON TRANSFER D (PETD)	group IIB	IGV: splicing OK, a little bit more downstream accumulation
ATCG00340:exon:1	70.6942	1.27e-179	202062	152094	210585	2643.01	2825.95	2435.47	Encodes the D1 subunit of photosystem I reaction center.	(PSAB)	#N/A	.
ATCG00670:exon:3	70.0685	2.14e-122	8286.2	6436.33	9408.9	110.285	124.876	103.901	Encodes the only ClpP (caseinolytic protease) encoded within the plastid genome. Contains a highly conserved catalytic triad of Ser-type proteases (Ser-His-Asp). Part of the 350 kDa chloroplast Clp complex. The name reflects nomenclature described in Adam et. al (2001).	PLASTID-ENCODED CLP P (PCLPP)	group IIA	IGV: splicing OK, but carefully look downstream (ATCG0065, RPS12A), there also good RIP
ATCG00130:exon:1	66.2856	6.26e-145	12282.8	9624.84	13288.6	159.301	202.035	162.563	ATPase F subunit.	(ATPF)	group IIA	IGV: nothing special
ATCG00030:exon:1	65.7387	1.2e-152	19081.8	14458.6	18859.5	273.415	268.027	246.579	Lysine tRNA	TRNALYS (TRNK)	group IIA	IGV: nothing special, but nice RIP data first exon
ATCG00700:exon:1	65.3729	2.42e-152	11967.3	9208.35	13018.3	154.705	176.654	184.935	PSII low MW protein	PHOTOSYSTEM II REACTION CENTER PROTEIN N (PSBN)	#N/A	.
ATCG00460:exon:1	64.8434	7.51e-10	167.398	85.5051	206.959	0	4.56863	0.994272	Chloroplast encoded tRNA-Met gene.	(TRNM)	#N/A	.
ATCG01110:exon:1	63.5108	4.84e-107	4740.26	3487.78	5283.63	74.2892	78.1744	57.1706	Encodes the 49KDa plastid NAD(P)H dehydrogenase subunit H protein. Its transcription is regulated by an ndhF-specific plastid sigma factor, SIG4.	NAD(P)H DEHYDROGENASE SUBUNIT H (NDHH)	#N/A	.
ATCG01250:exon:2	63.5007	8.74e-06	67.603	48.269	166.803	2.2976	0	0.994272	NADH dehydrogenase ND2	(NDHB.2)	group IIB	IGV: similar to WT, although nice RIP to intron
ATCG00180:exon:2	63.2897	2.83e-144	8614.56	6447.36	9178.78	124.071	130.46	123.787	RNA polymerase beta' subunit-1	(RPOC1)	group IIB	IGV: like read-trough, RIP also OK
ATCG00170:exon:1	62.6878	7.88e-133	12068.7	9013.89	13472.4	179.213	212.188	152.621	RNA polymerase beta' subunit-2	(RPOC2)	#N/A	.
ATCG00350:exon:1	60.3591	5.26e-165	159505	119047	166631	2420.14	2643.72	2236.12	Encodes psaA protein comprising the reaction center for photosystem I along with psaB protein; hydrophobic protein encoded by the chloroplast genome.	(PSAA)	#N/A	.
ATCG00790:exon:2	59.7197	1.11e-155	11109.4	8837.36	11943.4	165.428	195.944	166.541	chloroplast gene encoding a ribosomal protein L16, which is a constituent of 50S large ribosomal subunit	RIBOSOMAL PROTEIN L16 (RPL16)	group IIB	IGV, like WT
ATCG00390:exon:1	53.9503	7.61e-36	323.529	259.273	407.74	6.12695	2.53813	8.94845	tRNA-Thr	(TRNT.2)	#N/A	.
ATCG00760:exon:1	53.2413	7.56e-57	1350.45	1006.75	1610.88	30.6347	13.1983	29.331	encodes a chloroplast ribosomal protein L36, a constituent of the large subunit of the ribosomal complex	RIBOSOMAL PROTEIN L36 (RPL36)	#N/A	.
ATCG00450:exon:1	52.8596	3.33e-107	7048.42	5356.48	7966.37	100.329	152.288	126.273	tRNA-Val	(TRNV.1)	group IIA	.
ATCG00430:exon:1	50.7567	6.55e-108	4162.41	3253.33	4820.29	81.9479	94.4184	61.6449	Encodes a protein which was originally thought to be part of photosystem II but its wheat homolog was later shown to encode for subunit K of NADH dehydrogenase.	PHOTOSYSTEM II REACTION CENTER PROTEIN G (PSBG)	#N/A	.
ATCG00410:exon:1	50.3634	1.59e-85	1574.18	1119.84	1663.39	32.9323	23.3508	29.331	chloroplast TRNF	(TRNF)	#N/A	.
ATCG00670:exon:1	48.7785	6.76e-110	3983.75	2850.63	4216.4	67.3964	77.6668	78.0504	Encodes the only ClpP (caseinolytic protease) encoded within the plastid genome. Contains a highly conserved catalytic triad of Ser-type proteases (Ser-His-Asp). Part of the 350 kDa chloroplast Clp complex. The name reflects nomenclature described in Adam et. al (2001).	PLASTID-ENCODED CLP P (PCLPP)	group IIA	IGV: splicing OK, but carefully look downstream (ATCG0065, RPS12A), there also good RIP
ATCG00500:exon:1	47.9279	1.64e-109	4621.15	3680.86	5041.15	81.182	105.586	87.4959	Encodes the carboxytransferase beta subunit of the Acetyl-CoA carboxylase (ACCase) complex in plastids. This complex catalyzes the carboxylation of acetyl-CoA to produce malonyl-CoA, the first committed step in fatty acid synthesis.	ACETYL-COA CARBOXYLASE CARBOXYL TRANSFERASE SUBUNIT BETA (ACCD)	#N/A	.
AT2G07732:exon:1	47.8007	8.38e-34	255.926	266.169	341.328	4.59521	5.07626	7.45704	Ribulose bisphosphate carboxylase large chain, catalytic domain; FUNCTIONS IN: ribulose-bisphosphate carboxylase activity, magnesium ion binding; INVOLVED IN: carbon fixation; LOCATED IN: plastid; CONTAINS InterPro DOMAIN/s: Ribulose bisphosphate carboxylase, large subunit, C-terminal (InterPro:IPR000685); BEST Arabidopsis thaliana protein match is: Ribulose bisphosphate carboxylase large chain, …	.	#N/A	.
ATCG00150:exon:1	47.7753	1.34e-122	8728.84	6310.83	9306.97	164.662	189.852	149.141	Encodes a subunit of ATPase complex CF0, which is a proton channel that supplies the proton motive force to drive ATP synthesis by CF1 portion of the complex.	(ATPI)	#N/A	.
ATCG00820:exon:1	46.0861	2.59e-62	1063.94	726.793	1144.45	15.3174	29.9499	16.4055	Encodes a 6.8-kDa protein of the small ribosomal subunit.	RIBOSOMAL PROTEIN S19 (RPS19)	#N/A	.
ATCG00120:exon:1	44.4388	2.28e-137	46720.1	34352.4	48562.7	1007.12	1024.9	857.063	Encodes the ATPase alpha subunit, which is a subunit of ATP synthase and part of the CF1 portion which catalyzes the conversion of ADP to ATP using the proton motive force. This complex is located in the thylakoid membrane of the chloroplast.	ATP SYNTHASE SUBUNIT ALPHA (ATPA)	#N/A	.
ATCG00680:exon:1	44.4183	5.16e-134	72103.5	54651.5	77705.3	1584.58	1678.72	1294.05	encodes for CP47, subunit of the photosystem II reaction center.	PHOTOSYSTEM II REACTION CENTER PROTEIN B (PSBB)	#N/A	.
ATCG00720:exon:2	42.1192	7.82e-111	27392.1	21026	29510.2	592.016	683.265	553.312	Encodes the cytochrome b(6) subunit of the cytochrome b6f complex.	PHOTOSYNTHETIC ELECTRON TRANSFER B (PETB)	group IIB	IGV: splicing OK
ATCG00370:exon:1	41.0914	1.57e-83	2005.56	1609.43	2293.54	54.3766	44.1635	43.748	tRNA-Ser	(TRNS.3)	#N/A	.
ATCG01090:exon:1	40.8528	1.08e-93	3542.72	2725.13	3935.31	78.1186	74.1134	93.9587	Encodes subunit of the chloroplast NAD(P)H dehydrogenase complex	(NDHI)	#N/A	.
ATCG00790:exon:1	40.5627	1.15e-22	257.535	131.016	278.004	3.82934	1.52288	9.94272	chloroplast gene encoding a ribosomal protein L16, which is a constituent of 50S large ribosomal subunit	RIBOSOMAL PROTEIN L16 (RPL16)	group IIB	IGV, like WT
ATCG00330:exon:1	40.3498	2.46e-122	20874.8	15855.7	21963.9	493.219	497.474	449.411	30S chloroplast ribosomal protein S14	CHLOROPLAST RIBOSOMAL PROTEIN S14 (RPS14)	#N/A	.
ATCG00130:exon:2	39.9161	4.8e-113	7111.19	5444.74	7842.81	158.535	173.1	173.5	ATPase F subunit.	(ATPF)	group IIA	.
AT2G21710:exon:3	39.2376	0.0171145	12.8768	5.51646	6.17788	0	0	0	embryo defective 2219 (EMB2219); INVOLVED IN: embryo development ending in seed dormancy; LOCATED IN: cellular_component unknown; EXPRESSED IN: 9 plant structures; EXPRESSED DURING: LP.04 four leaves visible, F mature embryo stage, petal differentiation and expansion stage, E expanded cotyledon stage, D bilateral stage; CONTAINS InterPro DOMAIN/s: Mitochodrial transcription termination factor-rel…	EMBRYO DEFECTIVE 2219 (EMB2219)	#N/A	.
ATCG01280:exon:1	39.1081	4.3e-25	199.59	158.598	197.692	0.765868	4.56863	7.45704	YCF2.2; FUNCTIONS IN: nucleoside-triphosphatase activity, nucleotide binding, ATP binding; INVOLVED IN: biological_process unknown; LOCATED IN: chloroplast; CONTAINS InterPro DOMAIN/s: ATPase, AAA+ type, core (InterPro:IPR003593), ATPase, AAA-type, core (InterPro:IPR003959), Chloroplast Ycf2 (InterPro:IPR008543); BEST Arabidopsis thaliana protein match is: Chloroplast Ycf2;ATPase, AAA type, core …	(YCF2.2)	#N/A	.
ATCG00490:exon:1	38.7959	2.67e-139	778695	587202	780019	18344.8	19696.4	16793.8	large subunit of RUBISCO. Protein is tyrosine-phosphorylated and its phosphorylation state is modulated in response to ABA in Arabidopsis thaliana seeds.	(RBCL)	#N/A	.
ATCG00530:exon:1	38.6811	1.93e-95	4757.97	3527.77	5195.59	98.797	122.338	122.295	YCF10; LOCATED IN: endomembrane system, integral to membrane; EXPRESSED IN: 22 plant structures; EXPRESSED DURING: 13 growth stages; CONTAINS InterPro DOMAIN/s: CemA (InterPro:IPR004282); BEST Arabidopsis thaliana protein match is: CemA-like proton extrusion protein-related (TAIR:AT4G31040.1).	(YCF10)	#N/A	.
ATCG00660:exon:1	37.9248	2.72e-89	2770.11	2140.39	3062.68	75.0551	79.6973	53.1936	encodes a chloroplast ribosomal protein L20, a constituent of the large subunit of the ribosomal complex	RIBOSOMAL PROTEIN L20 (RPL20)	#N/A	.
ATCG00190:exon:1	37.6441	4.26e-98	8667.67	5902.61	8707.72	217.507	225.386	168.529	Chloroplast DNA-dependent RNA polymerase B subunit. The transcription of this gene is regulated by a nuclear encoded RNA polymerase. This gene has been transferred to mitochondrial genome during crucifer evolution.	RNA POLYMERASE SUBUNIT BETA (RPOB)	#N/A	.
ATCG00420:exon:1	37.4196	5.32e-106	3343.13	2983.02	4052.69	81.182	104.063	88.4902	Encodes NADH dehydrogenase subunit J. Its transcription is increased upon sulfur depletion.	NADH DEHYDROGENASE SUBUNIT J (NDHJ)	#N/A	.
ATCG00740:exon:1	37.4183	2.77e-97	9420.96	6720.42	9285.35	216.741	219.802	234.648	RNA polymerase alpha subunit	RNA POLYMERASE SUBUNIT ALPHA (RPOA)	#N/A	.
ATCG00890:exon:1	36.3279	7.36e-10	109.453	35.857	37.0673	0.765868	2.0305	1.49141	NADH dehydrogenase ND2	(NDHB.1)	group IIB	IGV: similar to WT, although nice RIP to intron
ATCG00050:exon:1	35.5983	1.3e-11	286.508	235.829	316.616	9.95629	10.6601	0.994272	Homologous to the bacterial ribosomal protein S16	RIBOSOMAL PROTEIN S16 (RPS16)	group IIB	IGV: splicing not nicely seen, also not in WT
ATCG00180:exon:1	33.6494	7.72e-66	1261.92	929.523	1373.03	42.1228	37.0567	25.8511	RNA polymerase beta' subunit-1	(RPOC1)	group IIB	IGV: like read-trough, RIP also OK
ATCG00230:exon:1	31.2605	1.14e-24	288.118	179.285	296.538	8.42455	11.1678	3.97709	tRNA-Asp	(TRND)	#N/A	.
ATCG01240:exon:1	31.0517	0.0063282	33.8015	9.6538	6.17788	0	1.01525	0	30S chloroplast ribosomal protein S7	RIBOSOMAL PROTEIN S7 (RPS7.2)	#N/A	.
ATCG00100:exon:1	30.8287	6.04e-81	4930.19	4504.19	6000.26	180.745	150.257	164.055	tRNA-Gly	(TRNG.1)	group IIB	.
ATCG00620:exon:1	30.5992	3.63e-54	859.524	639.909	900.425	16.0832	34.0109	25.8511	tRNA-Pro	(TRNP)	#N/A	.
ATCG00800:exon:1	30.5299	7.03e-70	2118.23	1637.01	2620.96	64.3329	81.2202	60.1535	encodes a chloroplast ribosomal protein S3, a constituent of the small subunit of the ribosomal complex	RESISTANCE TO PSEUDOMONAS SYRINGAE 3 (RPS3)	#N/A	.
ATCG00920:exon:1	29.5631	1.6e-58	193976	130343	189548	6104.74	7338.24	3654.94	chloroplast-encoded 16S ribosomal RNA	RIBOSOMAL RNA16S (RRN16S.1)	#N/A	.
ATCG00160:exon:1	29.4097	1.51e-65	1638.57	1239.82	1763.78	47.4838	69.0371	38.7766	Chloroplast ribosomal protein S2	RIBOSOMAL PROTEIN S2 (RPS2)	#N/A	.
ATCG00540:exon:1	28.5772	7.71e-97	10761.8	8576.71	12596.7	388.295	387.319	331.59	Encodes cytochrome f apoprotein; involved in photosynthetic electron transport chain; encoded by the chloroplast genome and is transcriptionally repressed by a nuclear gene HCF2.	PHOTOSYNTHETIC ELECTRON TRANSFER A (PETA)	#N/A	.
ATCG00480:exon:1	27.6499	5.84e-100	30683.7	22780.2	32781.4	951.974	1201.04	937.599	chloroplast-encoded gene for beta subunit of ATP synthase	ATP SYNTHASE SUBUNIT BETA (PB)	#N/A	.
ATCG00780:exon:1	27.2537	9.47e-69	3677.93	2656.17	3819.47	158.535	113.201	97.4387	encodes a chloroplast ribosomal protein L14, a constituent of the large subunit of the ribosomal complex	RIBOSOMAL PROTEIN L14 (RPL14)	#N/A	.
ATCG00110:exon:1	27.1867	4.01e-40	535.995	456.487	789.224	19.1467	22.3355	22.3711	tRNA-Arg	(TRNR.1)	#N/A	.
ATCG00950:exon:1	26.5522	9.05e-80	1.02228e+06	805007	1.15077e+06	29942.4	40178.6	40815.4	chloroplast-encoded 23S ribosomal RNA	RIBOSOMAL RNA23S (RRN23S.1)	#N/A	.
ATCG00730:exon:2	26.0361	6.63e-97	9395.21	7273.45	10358.8	315.538	383.765	329.104	A chloroplast gene encoding subunit IV of the cytochrome b6/f complex	PHOTOSYNTHETIC ELECTRON TRANSFER D (PETD)	group IIB	IGV: splicing OK, a little bit more downstream accumulation
ATCG00290:exon:1	25.542	1.01e-71	1389.08	1068.81	1519.76	49.7814	53.8084	50.2107	tRNA-Ser	(TRNS.2)	#N/A	.
ATCG01180:exon:1	25.3314	2.22e-80	1.16827e+06	743378	934762	36363.4	41851.7	32988.5	chloroplast-encoded 23S ribosomal RNA	RIBOSOMAL RNA23S (RRN23S.2)	#N/A	.
ATCG00610:exon:1	25.306	3.12e-40	455.516	311.68	526.664	22.2102	14.7212	13.9198	tRNA-Trp	(TRNW)	#N/A	.
ATCG00570:exon:1	24.9611	2.37e-54	1411.62	995.72	1685.02	53.6108	47.2092	60.6506	PSII cytochrome b559	PHOTOSYSTEM II REACTION CENTER PROTEIN F (PSBF)	#N/A	.
ATCG00770:exon:1	24.7722	1.81e-56	1205.59	915.732	1298.9	36.7617	59.3922	39.2737	chloroplast 30S ribosomal protein S8	RIBOSOMAL PROTEIN S8 (RPS8)	#N/A	.
ATCG00810:exon:1	24.3882	3.29e-59	1166.96	777.82	1246.39	38.2934	42.133	48.2222	encodes a chloroplast ribosomal protein L22, a constituent of the large subunit of the ribosomal complex	RIBOSOMAL PROTEIN L22 (RPL22)	#N/A	.
ATCG00690:exon:1	24.3704	1.66e-73	2168.13	1612.18	2356.86	93.4359	82.743	73.5761	Encodes photosystem II 5 kD protein subunit PSII-T. This is a plastid-encoded gene (PsbTc) which also has a nuclear-encoded paralog (PsbTn).	PHOTOSYSTEM II REACTION CENTER PROTEIN T (PSBT)	#N/A	.
ATCG00890:exon:2	23.6071	5.98e-31	360.549	297.889	359.861	14.5515	12.6907	14.9141	NADH dehydrogenase ND2	(NDHB.1)	group IIB	IGV: similar to WT, although nice RIP to intron
ATCG01210:exon:1	23.1744	7.81e-79	188641	136694	160795	6960.98	8484.46	5327.81	chloroplast-encoded 16S ribosomal RNA	RIBOSOMAL RNA 16S (RRN16S.2)	#N/A	.
ATCG01250:exon:1	22.8794	0.00112927	19.3151	28.9614	13.9002	0	2.0305	0	NADH dehydrogenase ND2	(NDHB.2)	group IIB	IGV: similar to WT, although nice RIP to intron
ATCG00030:exon:2	22.6005	3.88e-67	1012.44	904.699	1045.61	44.4204	42.133	43.2508	Lysine tRNA	TRNALYS (TRNK)	group IIA	.
ATCG00140:exon:1	22.1336	4.32e-97	31662.4	24535.8	33433.1	1275.94	1446.23	1296.53	ATPase III subunit	(ATPH)	#N/A	.
ATCG00520:exon:1	21.6807	1.15e-78	4234.85	3283.67	4511.39	208.316	185.791	156.598	Encodes a protein required for photosystem I assembly and stability. In cyanobacteria, loss of function mutation in this gene increases PSII/PSI ratio without any influence on photoautotrophic growth.	(YCF4)	#N/A	.
ATCG00060:exon:1	20.9824	2.5e-24	249.487	148.944	202.325	9.19042	12.183	6.46277	tRNA-Gln	(TRNQ)	#N/A	.
ATCG01130:exon:1	20.7726	3.64e-63	1754.46	1340.5	2089.67	94.2018	85.7888	67.6105	YCF1.2; FUNCTIONS IN: protein binding; LOCATED IN: chloroplast, membrane; EXPRESSED IN: cultured cell, leaf; CONTAINS InterPro DOMAIN/s: Ycf1 (InterPro:IPR008896); BEST Arabidopsis thaliana protein match is: Ycf1 protein (TAIR:ATCG01000.1).	(YCF1.2)	#N/A	.
ATCG01020:exon:1	20.3885	1.12e-38	756.51	615.085	821.657	31.4006	47.7168	26.3482	encodes a chloroplast ribosomal protein L32, a constituent of the large subunit of the ribosomal complex	RIBOSOMAL PROTEIN L32 (RPL32)	#N/A	.
ATCG00280:exon:1	19.4926	4.75e-86	53686.5	40041.2	57520.7	2626.16	2758.44	2316.65	chloroplast gene encoding a CP43 subunit of the photosystem II reaction center. promoter contains a blue-light responsive element.	PHOTOSYSTEM II REACTION CENTER PROTEIN C (PSBC)	#N/A	.
AT5G38420:exon:1	18.6933	0.0378491	9.65757	11.0329	9.26681	0	0	0.994272	Encodes a member of the Rubisco small subunit (RBCS) multigene family: RBCS1A (At1g67090), RBCS1B (At5g38430), RBCS2B (At5g38420), and RBCS3B (At5g38410).	RUBISCO SMALL SUBUNIT 2B (RBCS2B)	#N/A	.
ATCG00040:exon:1	17.942	3.23e-75	14650.5	11732.1	17729	791.142	907.635	740.236	Encodes a maturase located in the trnK intron in the chloroplast genome.	MATURASE K (MATK)	#N/A	.
ATCG00580:exon:1	17.7957	1.47e-74	10008.5	7026.59	9910.86	459.521	560.419	481.725	PSII cytochrome b559. There have been many speculations about the function of Cyt b559, but the most favored at present is that it plays a protective role by acting as an electron acceptor or electron donor under conditions when electron flow through PSII is not optimized.	PHOTOSYSTEM II REACTION CENTER PROTEIN E (PSBE)	#N/A	.
ATCG00020:exon:1	17.0722	5.93e-83	458635	339389	467318	24392.9	25761	23459.8	Encodes chlorophyll binding protein D1, a part of the photosystem II reaction center core	PHOTOSYSTEM II REACTION CENTER PROTEIN A (PSBA)	#N/A	.
ATCG00980:exon:1	17.0108	0.0065369	8.04798	24.8241	16.9892	1.53174	1.01525	0	tRNA-Arg	(TRNR.2)	#N/A	.
ATCG01050:exon:1	16.4956	1.06e-79	6993.69	5750.91	7802.66	407.442	426.406	403.177	Represents a plastid-encoded subunit of a NAD(P)H dehydrogenase complex. Its mRNA is edited at four positions. Translation data is not available for this gene.	(NDHD)	#N/A	.
ATCG01000:exon:1	16.0822	7.81e-09	56.3359	49.6481	74.1345	2.2976	4.56863	3.47995	YCF1.1; LOCATED IN: endomembrane system; EXPRESSED IN: guard cell; CONTAINS InterPro DOMAIN/s: Ycf1 (InterPro:IPR008896); BEST Arabidopsis thaliana protein match is: Ycf1 protein (TAIR:ATCG01130.1).	(YCF1.1)	#N/A	.
ATCG01160:exon:1	15.4389	7.74e-11	931.956	798.507	2832.56	67.3964	112.693	101.416	Chloroplast-encoded 5S ribosomal RNA, which is a component of the 50S large subunit of the plastidic ribosome.	RIBOSOMAL RNA5S (RRN5S)	#N/A	.
ATCG01070:exon:1	14.6015	1.62e-33	902.983	638.53	1033.25	55.9084	72.5905	45.2394	NADH dehydrogenase ND4L	(NDHE)	#N/A	.
ATCG00560:exon:1	14.1625	9.08e-43	1883.23	1274.3	1998.54	111.817	116.754	131.244	PSII L protein	PHOTOSYSTEM II REACTION CENTER PROTEIN L (PSBL)	#N/A	.
ATCG00440:exon:1	14.1539	3.66e-44	653.496	564.058	745.978	49.7814	43.1482	44.7422	Encodes NADH dehydrogenase D3 subunit of the chloroplast NAD(P)H dehydrogenase complex	(NDHC)	#N/A	.
ATCG00470:exon:1	13.7377	6.06e-48	2726.66	1912.83	2707.45	174.618	203.558	151.626	ATPase epsilon subunit	ATP SYNTHASE EPSILON CHAIN (ATPE)	#N/A	.
ATCG00050:exon:2	13.3164	6.26e-16	181.884	144.807	223.948	4.59521	15.7364	18.8912	Homologous to the bacterial ribosomal protein S16	RIBOSOMAL PROTEIN S16 (RPS16)	group IIB	IGV: splicing not nicely seen, also not in WT
ATCG01010:exon:1	12.6527	1.56e-50	1504.97	1111.57	1598.53	114.114	109.14	107.381	Chloroplast encoded NADH dehydrogenase unit.	(NDHF)	#N/A	.
ATCG00380:exon:1	12.5354	2.49e-51	2057.06	1501.86	2046.42	137.09	163.963	142.181	Chloroplast encoded ribosomal protein S4	CHLOROPLAST RIBOSOMAL PROTEIN S4 (RPS4)	#N/A	.
ATCG00200:exon:1	12.4843	2.26e-14	127.158	111.708	197.692	11.488	8.12202	14.4169	a chloroplast-encoded tRNA for cysteine	(TRNC)	#N/A	.
ATCG01060:exon:1	12.2634	3.17e-42	2717	2068.67	3166.16	208.316	241.122	192.889	Encodes the PsaC subunit of photosystem I.	(PSAC)	#N/A	.
ATCG00860:exon:1	11.4985	3.63e-22	197.98	227.554	262.56	16.8491	23.3508	18.394	Encodes an unknown protein. This gene is regulated by AtSIG6 transcriptionally.	(YCF2.1)	#N/A	.
ATCG00270:exon:1	11.1983	1.19e-57	13259.8	10459.2	13912.6	1132.72	1169.06	1038.52	PSII D2 protein	PHOTOSYSTEM II REACTION CENTER PROTEIN D (PSBD)	#N/A	.
ATCG00830:exon:1	10.4462	1.47e-06	85.3086	42.7525	91.1237	11.488	4.56863	4.47422	encodes a chloroplast ribosomal protein L2, a constituent of the large subunit of the ribosomal complex	RIBOSOMAL PROTEIN L2 (RPL2.1)	group IIA	IGV: splicing also in WT not so nicely seen, like WT
ATCG00900:exon:1	10.3061	0.00254752	20.9247	19.3076	44.7896	0.765868	1.52288	4.97136	encodes a chloroplast ribosomal protein S7, a constituent of the small subunit of the ribosomal complex	(RPS7.1)	#N/A	.
ATCG01080:exon:1	10.0607	3.23e-38	1224.9	1106.05	1419.37	121.773	140.612	107.381	NADH dehydrogenase ND6	(NDHG)	#N/A	.
AT2G39570:exon:4	9.70725	0.00198896	28.9727	27.5823	27.8004	3.06347	3.55338	1.49141	Encodes a ACT domain-containing protein. The ACT domain, named after bacterial aspartate kinase, chorismate mutase and TyrA (prephenate dehydrogenase), is a regulatory domain that serves as an amino acid-binding site in feedback-regulated amino acid metabolic enzymes.	ACT DOMAIN REPEATS 9 (ACR9)	#N/A	.
ATCG00010:exon:1	9.6597	1.6e-17	465.173	329.608	628.599	58.9719	48.2245	38.2795	A chloroplast gene encoding a histidine-accepting tRNA.	TRNAHIS (TRNH)	#N/A	.
ATCG00090:exon:1	9.65615	6.33e-38	825.723	703.348	884.981	84.2455	90.8651	73.079	tRNA-Ser	(TRNS.1)	#N/A	.
ATCG00640:exon:1	8.7857	2.86e-25	4180.12	2814.77	4020.25	346.938	463.97	429.526	encodes a chloroplast ribosomal protein L33, a constituent of the large subunit of the ribosomal complex	RIBOSOMAL PROTEIN L33 (RPL33)	#N/A	.
AT1G07017:exon:2	8.63851	7.36e-10	106.233	139.291	166.803	19.9126	12.183	14.9141	.	.	#N/A	.
ATCG00550:exon:1	8.63743	4.23e-37	3405.9	2496.2	3697.46	379.105	369.044	355.949	PSII component	PHOTOSYSTEM II REACTION CENTER PROTEIN J (PSBJ)	#N/A	.
ATCG00650:exon:1	7.96633	3.6e-28	1261.92	929.523	1221.67	134.027	163.963	126.77	chloroplast-encoded ribosomal protein S18	RIBOSOMAL PROTEIN S18 (RPS18)	#N/A	.
ATCG00260:exon:1	7.77429	0.0171145	16.096	20.6867	29.3449	2.2976	2.53813	2.98282	tRNA-Thr	(TRNT.1)	#N/A	.
ATCG00220:exon:1	7.39948	8.81e-15	334.796	234.449	261.015	51.3132	36.5491	23.8625	PSII low MW protein	PHOTOSYSTEM II REACTION CENTER PROTEIN M (PSBM)	#N/A	.
ATCG01030:exon:1	6.9009	0.0064379	24.1439	28.9614	32.4338	3.06347	2.53813	5.96563	tRNA-Leu	(TRNL.3)	#N/A	.
ATCG00600:exon:1	6.44688	6.87e-12	218.905	140.67	171.436	32.9323	28.4271	20.3826	Cytochrome b6-f complex, subunit V. Disruption of homologous gene in Chlamydomonas results in disruption of cytochrome b6-f complex.	(PETG)	#N/A	.
ATCG00210:exon:1	6.30747	2.54e-18	608.427	441.317	580.72	79.6503	88.3269	87.9931	YCF6; FUNCTIONS IN: electron transporter, transferring electrons within cytochrome b6/f complex of photosystem II activity; INVOLVED IN: cytochrome complex assembly; LOCATED IN: endomembrane system, cytochrome b6f complex; EXPRESSED IN: 22 plant structures; EXPRESSED DURING: 13 growth stages; CONTAINS InterPro DOMAIN/s: Cytochrome b6-f complex, subunit 8 (InterPro:IPR005497).	(YCF6)	#N/A	.
ATCG00250:exon:1	5.54395	1.93e-06	130.377	79.9886	105.024	22.976	16.7517	16.4055	this chloroplast gene encodes a UUC tRNA whose expression is regulated by SIG2.	(TRNE)	#N/A	.
ATCG00300:exon:1	4.9959	5.25e-14	598.77	448.212	684.2	94.2018	138.582	110.364	encodes PsbZ, which is a subunit of photosystem II. In Chlamydomonas, this protein has been shown to be essential in the interaction between PS II and the light harvesting complex II.	(YCF9)	#N/A	.
ATCG01040:exon:1	4.79687	2.5e-12	321.919	239.966	330.516	70.4599	60.9151	53.6907	YCF5; INVOLVED IN: respiratory chain complex IV assembly, protein complex assembly; LOCATED IN: endomembrane system, membrane; EXPRESSED IN: 23 plant structures; EXPRESSED DURING: 13 growth stages; CONTAINS InterPro DOMAIN/s: Cytochrome c assembly protein (InterPro:IPR002541), Cytochrome c-type biogenesis protein CcsA (InterPro:IPR017562).	(YCF5)	#N/A	.
AT2G34430:exon:1	4.37219	7.78e-20	1902.54	1667.35	1944.49	387.529	435.543	432.508	Photosystem II type I chlorophyll a/b-binding protein The mRNA is cell-to-cell mobile.	LIGHT-HARVESTING CHLOROPHYLL-PROTEIN COMPLEX II SUBUNIT B1 (LHB1B1)	#N/A	.
ATCG00080:exon:1	4.07753	1.47e-09	545.653	370.982	554.464	117.944	117.262	122.793	PSII I protein	PHOTOSYSTEM II REACTION CENTER PROTEIN I (PSBI)	#N/A	.
ATCG00630:exon:1	4.01388	1.54e-11	663.153	558.541	715.089	150.876	164.471	164.055	Encodes subunit J of photosystem I.	(PSAJ)	#N/A	.
ATCG01120:exon:1	3.91146	0.0109404	53.1167	33.0987	46.3341	7.65868	10.6601	14.4169	encodes a chloroplast ribosomal protein S15, a constituent of the small subunit of the ribosomal complex	CHLOROPLAST RIBOSOMAL PROTEIN S15 (RPS15)	#N/A	.
ATCG00510:exon:1	3.73996	4.96e-11	392.741	318.575	403.106	92.6701	96.9566	106.387	Encodes subunit I of photosystem I.	PHOTSYSTEM I SUBUNIT I (PSAI)	#N/A	.
ATCG00070:exon:1	2.71579	5.47e-06	428.152	413.734	577.631	164.662	174.623	180.958	PSII K protein	PHOTOSYSTEM II REACTION CENTER PROTEIN K PRECURSOR (PSBK)	#N/A	.

## Sheet: data on only one exon
Gene Model Name	Fold change mTERF2/RBP	p-adj	mTERF2_1	mTERF2_2	mTERF2_3	control_1	control_2	control_3	Gene Model Description	Primary Gene Symbol	Intron classification	Comment
ATCG01200:exon:1	1486.89	7.43e-231	18681	15948.1	24209.5	6.89281	15.7364	14.4169	tRNA-Ile	(TRNI.3)	group IIA	Nothing special in IGV, Northern
ATCG00940:exon:2	825.601	3.54e-38	927.127	391.668	943.67	0	1.52288	0.497136	tRNA-Ala	(TRNA.1)	group IIA	Nothing special in IGV, Northern
ATCG00960:exon:1	232.754	9.61e-34	21066.4	3661.55	23820.3	71.2258	44.1635	69.599	Chloroplast-encoded 4.5S ribosomal RNA, which is a constituent of the 50S large subunit of plastidic ribosome.	RIBOSOMAL RNA4.5S (RRN4.5S.1)	#N/A	Northern. Not detected in RNA-Seq, because of rRNA depletion
ATCG01230:exon:1	222.656	1.25e-20	109.453	104.813	552.92	1.53174	1.52288	0	chloroplast gene encoding ribosomal protein s12. The gene is located in three distinct loci on the chloroplast genome and is transpliced to make one transcript.	RIBOSOMAL PROTEIN S12B (RPS12B)	group IIA	IGV: higher accumulation, especially first intron and upstream
ATCG01310:exon:1	194.067	1.06e-06	37.0207	38.6152	199.236	0.765868	0	0	encodes a chloroplast ribosomal protein L2, a constituent of the large subunit of the ribosomal complex	RIBOSOMAL PROTEIN L2 (RPL2.2)	group IIA	IGV: nothing special, but nice RIP data around intron
ATCG00065:exon:1	182.343	1.57e-190	13828	10884	15667.1	79.6503	53.8084	84.5131	chloroplast gene encoding ribosomal protein s12. The gene is located in three distinct loci on the chloroplast genome and is transpliced to make one transcript.	RIBOSOMAL PROTEIN S12A (RPS12A)	group IIB	Trans-splicing, looks interesting
ATCG00400:exon:2	159.3	2.65e-152	11851.5	9397.28	14148.9	49.7814	97.9718	68.6048	tRNA-Leu	(TRNL.1)	group I	IGV: higher accumulation in mterf2,
ATCG01190:exon:1	153.824	2.45e-14	5921.7	6353.58	3319.06	4.59521	24.366	51.205	tRNA-Ala	(TRNA.2)	group IIA	.
ATCG01150:exon:1	142.099	1.45e-06	25.7535	26.2032	29.3449	0	0	0	tRNA-Arg	(TRNR.3)	#N/A	.
ATCG01100:exon:2	132.831	8.64e-226	25924.1	19704.8	26016.6	188.404	176.146	168.529	NADH dehydrogenase ND1	(NDHA)	group IIB	IGV: splicing defect, good RIP data
ATCG00750:exon:1	130.889	1.49e-158	12192.7	9251.1	12752.7	63.5671	95.4337	96.4444	30S chloroplast ribosomal protein S11	RIBOSOMAL PROTEIN S11 (RPS11)	#N/A	.
ATCG00830:exon:2	105.813	2.49e-17	291.337	158.598	1030.16	4.59521	4.06101	3.47995	encodes a chloroplast ribosomal protein L2, a constituent of the large subunit of the ribosomal complex	RIBOSOMAL PROTEIN L2 (RPL2.1)	group IIA	IGV: splicing also in WT not so nicely seen, like WT
ATCG00360:exon:1	96.0342	3.72e-153	13135.9	9769.64	14162.8	127.134	147.212	105.89	Encodes a protein required for photosystem I assembly and stability. In Chlamydomonas reinhardtii, this protein seems to act as a PSI specific chaperone facilitating the assembly of the complex by interacting with PsaA and PsaD. A loss of function mutation in tobacco leads to a loss of photosystem I.	(YCF3)	group IIB	IGV: first exon splicing defect
ATCG00670:exon:2	90.5279	2.14e-156	13396.7	9764.13	14318.8	134.027	150.765	123.29	Encodes the only ClpP (caseinolytic protease) encoded within the plastid genome. Contains a highly conserved catalytic triad of Ser-type proteases (Ser-His-Asp). Part of the 350 kDa chloroplast Clp complex. The name reflects nomenclature described in Adam et. al (2001).	PLASTID-ENCODED CLP P (PCLPP)	group IIA	IGV: splicing OK, but carefully look downstream (ATCG0065, RPS12A), there also good RIP
ATCG00970:exon:1	87.9047	5.81e-13	1194.32	500.618	5495.22	16.8491	34.0109	17.3998	chloroplast-encoded 5S ribosomal RNA	RIBOSOMAL RNA5S (RRN5S)	#N/A	.
ATCG00720:exon:1	87.806	1.87e-173	9287.37	7961.63	9884.6	100.329	118.277	86.5017	Encodes the cytochrome b(6) subunit of the cytochrome b6f complex.	PHOTOSYNTHETIC ELECTRON TRANSFER B (PETB)	group IIB	IGV: splicing OK
ATCG00100:exon:2	76.6615	2.19e-136	21713.4	18063.6	22797.9	274.181	306.098	224.208	tRNA-Gly	(TRNG.1)	group IIB	IGV: nothing special
ATCG00710:exon:1	76.4378	3.38e-166	14829.2	11410.8	15441.6	199.126	187.314	153.118	Encodes a 8 kD phosphoprotein that is a component of the photosystem II oxygen evolving core. Its exact molecular function has not been determined but it may play a role in mediating electron transfer between the secondary quinone acceptors, QA and QB, associated with the acceptor side of PSII.	PHOTOSYSTEM II REACTION CENTER PROTEIN H (PSBH)	#N/A	.
ATCG00450:exon:2	72.5519	8.87e-132	5405.02	4155.27	5998.72	63.5671	80.7125	66.6162	tRNA-Val	(TRNV.1)	group IIA	.
ATCG00730:exon:1	70.8496	6.32e-134	4637.25	3485.02	4781.68	61.2695	52.7931	65.622	A chloroplast gene encoding subunit IV of the cytochrome b6/f complex	PHOTOSYNTHETIC ELECTRON TRANSFER D (PETD)	group IIB	IGV: splicing OK, a little bit more downstream accumulation
ATCG00340:exon:1	70.6942	1.27e-179	202062	152094	210585	2643.01	2825.95	2435.47	Encodes the D1 subunit of photosystem I reaction center.	(PSAB)	#N/A	.
ATCG00130:exon:1	66.2856	6.26e-145	12282.8	9624.84	13288.6	159.301	202.035	162.563	ATPase F subunit.	(ATPF)	group IIA	IGV: nothing special
ATCG00030:exon:1	65.7387	1.2e-152	19081.8	14458.6	18859.5	273.415	268.027	246.579	Lysine tRNA	TRNALYS (TRNK)	group IIA	IGV: nothing special, but nice RIP data first exon
ATCG00700:exon:1	65.3729	2.42e-152	11967.3	9208.35	13018.3	154.705	176.654	184.935	PSII low MW protein	PHOTOSYSTEM II REACTION CENTER PROTEIN N (PSBN)	#N/A	.
ATCG00460:exon:1	64.8434	7.51e-10	167.398	85.5051	206.959	0	4.56863	0.994272	Chloroplast encoded tRNA-Met gene.	(TRNM)	#N/A	.
ATCG01110:exon:1	63.5108	4.84e-107	4740.26	3487.78	5283.63	74.2892	78.1744	57.1706	Encodes the 49KDa plastid NAD(P)H dehydrogenase subunit H protein. Its transcription is regulated by an ndhF-specific plastid sigma factor, SIG4.	NAD(P)H DEHYDROGENASE SUBUNIT H (NDHH)	#N/A	.
ATCG00180:exon:2	63.2897	2.83e-144	8614.56	6447.36	9178.78	124.071	130.46	123.787	RNA polymerase beta' subunit-1	(RPOC1)	group IIB	IGV: like read-trough, RIP also OK
ATCG00170:exon:1	62.6878	7.88e-133	12068.7	9013.89	13472.4	179.213	212.188	152.621	RNA polymerase beta' subunit-2	(RPOC2)	#N/A	.
ATCG00350:exon:1	60.3591	5.26e-165	159505	119047	166631	2420.14	2643.72	2236.12	Encodes psaA protein comprising the reaction center for photosystem I along with psaB protein; hydrophobic protein encoded by the chloroplast genome.	(PSAA)	#N/A	.
ATCG00790:exon:2	59.7197	1.11e-155	11109.4	8837.36	11943.4	165.428	195.944	166.541	chloroplast gene encoding a ribosomal protein L16, which is a constituent of 50S large ribosomal subunit	RIBOSOMAL PROTEIN L16 (RPL16)	group IIB	IGV, like WT
ATCG00390:exon:1	53.9503	7.61e-36	323.529	259.273	407.74	6.12695	2.53813	8.94845	tRNA-Thr	(TRNT.2)	#N/A	.
ATCG00760:exon:1	53.2413	7.56e-57	1350.45	1006.75	1610.88	30.6347	13.1983	29.331	encodes a chloroplast ribosomal protein L36, a constituent of the large subunit of the ribosomal complex	RIBOSOMAL PROTEIN L36 (RPL36)	#N/A	.
ATCG00430:exon:1	50.7567	6.55e-108	4162.41	3253.33	4820.29	81.9479	94.4184	61.6449	Encodes a protein which was originally thought to be part of photosystem II but its wheat homolog was later shown to encode for subunit K of NADH dehydrogenase.	PHOTOSYSTEM II REACTION CENTER PROTEIN G (PSBG)	#N/A	.
ATCG00410:exon:1	50.3634	1.59e-85	1574.18	1119.84	1663.39	32.9323	23.3508	29.331	chloroplast TRNF	(TRNF)	#N/A	.
ATCG00500:exon:1	47.9279	1.64e-109	4621.15	3680.86	5041.15	81.182	105.586	87.4959	Encodes the carboxytransferase beta subunit of the Acetyl-CoA carboxylase (ACCase) complex in plastids. This complex catalyzes the carboxylation of acetyl-CoA to produce malonyl-CoA, the first committed step in fatty acid synthesis.	ACETYL-COA CARBOXYLASE CARBOXYL TRANSFERASE SUBUNIT BETA (ACCD)	#N/A	.
AT2G07732:exon:1	47.8007	8.38e-34	255.926	266.169	341.328	4.59521	5.07626	7.45704	Ribulose bisphosphate carboxylase large chain, catalytic domain; FUNCTIONS IN: ribulose-bisphosphate carboxylase activity, magnesium ion binding; INVOLVED IN: carbon fixation; LOCATED IN: plastid; CONTAINS InterPro DOMAIN/s: Ribulose bisphosphate carboxylase, large subunit, C-terminal (InterPro:IPR000685); BEST Arabidopsis thaliana protein match is: Ribulose bisphosphate carboxylase large chain, …	.	#N/A	.
ATCG00150:exon:1	47.7753	1.34e-122	8728.84	6310.83	9306.97	164.662	189.852	149.141	Encodes a subunit of ATPase complex CF0, which is a proton channel that supplies the proton motive force to drive ATP synthesis by CF1 portion of the complex.	(ATPI)	#N/A	.
ATCG00820:exon:1	46.0861	2.59e-62	1063.94	726.793	1144.45	15.3174	29.9499	16.4055	Encodes a 6.8-kDa protein of the small ribosomal subunit.	RIBOSOMAL PROTEIN S19 (RPS19)	#N/A	.
ATCG00120:exon:1	44.4388	2.28e-137	46720.1	34352.4	48562.7	1007.12	1024.9	857.063	Encodes the ATPase alpha subunit, which is a subunit of ATP synthase and part of the CF1 portion which catalyzes the conversion of ADP to ATP using the proton motive force. This complex is located in the thylakoid membrane of the chloroplast.	ATP SYNTHASE SUBUNIT ALPHA (ATPA)	#N/A	.
ATCG00680:exon:1	44.4183	5.16e-134	72103.5	54651.5	77705.3	1584.58	1678.72	1294.05	encodes for CP47, subunit of the photosystem II reaction center.	PHOTOSYSTEM II REACTION CENTER PROTEIN B (PSBB)	#N/A	.
ATCG01090:exon:1	40.8528	1.08e-93	3542.72	2725.13	3935.31	78.1186	74.1134	93.9587	Encodes subunit of the chloroplast NAD(P)H dehydrogenase complex	(NDHI)	#N/A	.
ATCG00330:exon:1	40.3498	2.46e-122	20874.8	15855.7	21963.9	493.219	497.474	449.411	30S chloroplast ribosomal protein S14	CHLOROPLAST RIBOSOMAL PROTEIN S14 (RPS14)	#N/A	.
AT2G21710:exon:3	39.2376	0.0171145	12.8768	5.51646	6.17788	0	0	0	embryo defective 2219 (EMB2219); INVOLVED IN: embryo development ending in seed dormancy; LOCATED IN: cellular_component unknown; EXPRESSED IN: 9 plant structures; EXPRESSED DURING: LP.04 four leaves visible, F mature embryo stage, petal differentiation and expansion stage, E expanded cotyledon stage, D bilateral stage; CONTAINS InterPro DOMAIN/s: Mitochodrial transcription termination factor-rel…	EMBRYO DEFECTIVE 2219 (EMB2219)	#N/A	.
ATCG00490:exon:1	38.7959	2.67e-139	778695	587202	780019	18344.8	19696.4	16793.8	large subunit of RUBISCO. Protein is tyrosine-phosphorylated and its phosphorylation state is modulated in response to ABA in Arabidopsis thaliana seeds.	(RBCL)	#N/A	.
ATCG00530:exon:1	38.6811	1.93e-95	4757.97	3527.77	5195.59	98.797	122.338	122.295	YCF10; LOCATED IN: endomembrane system, integral to membrane; EXPRESSED IN: 22 plant structures; EXPRESSED DURING: 13 growth stages; CONTAINS InterPro DOMAIN/s: CemA (InterPro:IPR004282); BEST Arabidopsis thaliana protein match is: CemA-like proton extrusion protein-related (TAIR:AT4G31040.1).	(YCF10)	#N/A	.
ATCG00660:exon:1	37.9248	2.72e-89	2770.11	2140.39	3062.68	75.0551	79.6973	53.1936	encodes a chloroplast ribosomal protein L20, a constituent of the large subunit of the ribosomal complex	RIBOSOMAL PROTEIN L20 (RPL20)	#N/A	.
ATCG00190:exon:1	37.6441	4.26e-98	8667.67	5902.61	8707.72	217.507	225.386	168.529	Chloroplast DNA-dependent RNA polymerase B subunit. The transcription of this gene is regulated by a nuclear encoded RNA polymerase. This gene has been transferred to mitochondrial genome during crucifer evolution.	RNA POLYMERASE SUBUNIT BETA (RPOB)	#N/A	.
ATCG00420:exon:1	37.4196	5.32e-106	3343.13	2983.02	4052.69	81.182	104.063	88.4902	Encodes NADH dehydrogenase subunit J. Its transcription is increased upon sulfur depletion.	NADH DEHYDROGENASE SUBUNIT J (NDHJ)	#N/A	.
ATCG00740:exon:1	37.4183	2.77e-97	9420.96	6720.42	9285.35	216.741	219.802	234.648	RNA polymerase alpha subunit	RNA POLYMERASE SUBUNIT ALPHA (RPOA)	#N/A	.
ATCG00890:exon:1	36.3279	7.36e-10	109.453	35.857	37.0673	0.765868	2.0305	1.49141	NADH dehydrogenase ND2	(NDHB.1)	group IIB	IGV: similar to WT, although nice RIP to intron
ATCG00050:exon:1	35.5983	1.3e-11	286.508	235.829	316.616	9.95629	10.6601	0.994272	Homologous to the bacterial ribosomal protein S16	RIBOSOMAL PROTEIN S16 (RPS16)	group IIB	IGV: splicing not nicely seen, also not in WT
ATCG00230:exon:1	31.2605	1.14e-24	288.118	179.285	296.538	8.42455	11.1678	3.97709	tRNA-Asp	(TRND)	#N/A	.
ATCG01240:exon:1	31.0517	0.0063282	33.8015	9.6538	6.17788	0	1.01525	0	30S chloroplast ribosomal protein S7	RIBOSOMAL PROTEIN S7 (RPS7.2)	#N/A	.
ATCG00620:exon:1	30.5992	3.63e-54	859.524	639.909	900.425	16.0832	34.0109	25.8511	tRNA-Pro	(TRNP)	#N/A	.
ATCG00800:exon:1	30.5299	7.03e-70	2118.23	1637.01	2620.96	64.3329	81.2202	60.1535	encodes a chloroplast ribosomal protein S3, a constituent of the small subunit of the ribosomal complex	RESISTANCE TO PSEUDOMONAS SYRINGAE 3 (RPS3)	#N/A	.
ATCG00920:exon:1	29.5631	1.6e-58	193976	130343	189548	6104.74	7338.24	3654.94	chloroplast-encoded 16S ribosomal RNA	RIBOSOMAL RNA16S (RRN16S.1)	#N/A	.
ATCG00160:exon:1	29.4097	1.51e-65	1638.57	1239.82	1763.78	47.4838	69.0371	38.7766	Chloroplast ribosomal protein S2	RIBOSOMAL PROTEIN S2 (RPS2)	#N/A	.
ATCG00540:exon:1	28.5772	7.71e-97	10761.8	8576.71	12596.7	388.295	387.319	331.59	Encodes cytochrome f apoprotein; involved in photosynthetic electron transport chain; encoded by the chloroplast genome and is transcriptionally repressed by a nuclear gene HCF2.	PHOTOSYNTHETIC ELECTRON TRANSFER A (PETA)	#N/A	.
ATCG00480:exon:1	27.6499	5.84e-100	30683.7	22780.2	32781.4	951.974	1201.04	937.599	chloroplast-encoded gene for beta subunit of ATP synthase	ATP SYNTHASE SUBUNIT BETA (PB)	#N/A	.
ATCG00780:exon:1	27.2537	9.47e-69	3677.93	2656.17	3819.47	158.535	113.201	97.4387	encodes a chloroplast ribosomal protein L14, a constituent of the large subunit of the ribosomal complex	RIBOSOMAL PROTEIN L14 (RPL14)	#N/A	.
ATCG00110:exon:1	27.1867	4.01e-40	535.995	456.487	789.224	19.1467	22.3355	22.3711	tRNA-Arg	(TRNR.1)	#N/A	.
ATCG00950:exon:1	26.5522	9.05e-80	1.02228e+06	805007	1.15077e+06	29942.4	40178.6	40815.4	chloroplast-encoded 23S ribosomal RNA	RIBOSOMAL RNA23S (RRN23S.1)	#N/A	.
ATCG00290:exon:1	25.542	1.01e-71	1389.08	1068.81	1519.76	49.7814	53.8084	50.2107	tRNA-Ser	(TRNS.2)	#N/A	.
ATCG00610:exon:1	25.306	3.12e-40	455.516	311.68	526.664	22.2102	14.7212	13.9198	tRNA-Trp	(TRNW)	#N/A	.
ATCG00570:exon:1	24.9611	2.37e-54	1411.62	995.72	1685.02	53.6108	47.2092	60.6506	PSII cytochrome b559	PHOTOSYSTEM II REACTION CENTER PROTEIN F (PSBF)	#N/A	.
ATCG00770:exon:1	24.7722	1.81e-56	1205.59	915.732	1298.9	36.7617	59.3922	39.2737	chloroplast 30S ribosomal protein S8	RIBOSOMAL PROTEIN S8 (RPS8)	#N/A	.
ATCG00810:exon:1	24.3882	3.29e-59	1166.96	777.82	1246.39	38.2934	42.133	48.2222	encodes a chloroplast ribosomal protein L22, a constituent of the large subunit of the ribosomal complex	RIBOSOMAL PROTEIN L22 (RPL22)	#N/A	.
ATCG00690:exon:1	24.3704	1.66e-73	2168.13	1612.18	2356.86	93.4359	82.743	73.5761	Encodes photosystem II 5 kD protein subunit PSII-T. This is a plastid-encoded gene (PsbTc) which also has a nuclear-encoded paralog (PsbTn).	PHOTOSYSTEM II REACTION CENTER PROTEIN T (PSBT)	#N/A	.
ATCG00030:exon:2	22.6005	3.88e-67	1012.44	904.699	1045.61	44.4204	42.133	43.2508	Lysine tRNA	TRNALYS (TRNK)	group IIA	.
ATCG00140:exon:1	22.1336	4.32e-97	31662.4	24535.8	33433.1	1275.94	1446.23	1296.53	ATPase III subunit	(ATPH)	#N/A	.
ATCG00520:exon:1	21.6807	1.15e-78	4234.85	3283.67	4511.39	208.316	185.791	156.598	Encodes a protein required for photosystem I assembly and stability. In cyanobacteria, loss of function mutation in this gene increases PSII/PSI ratio without any influence on photoautotrophic growth.	(YCF4)	#N/A	.
ATCG00060:exon:1	20.9824	2.5e-24	249.487	148.944	202.325	9.19042	12.183	6.46277	tRNA-Gln	(TRNQ)	#N/A	.
ATCG01020:exon:1	20.3885	1.12e-38	756.51	615.085	821.657	31.4006	47.7168	26.3482	encodes a chloroplast ribosomal protein L32, a constituent of the large subunit of the ribosomal complex	RIBOSOMAL PROTEIN L32 (RPL32)	#N/A	.
ATCG00280:exon:1	19.4926	4.75e-86	53686.5	40041.2	57520.7	2626.16	2758.44	2316.65	chloroplast gene encoding a CP43 subunit of the photosystem II reaction center. promoter contains a blue-light responsive element.	PHOTOSYSTEM II REACTION CENTER PROTEIN C (PSBC)	#N/A	.
AT5G38420:exon:1	18.6933	0.0378491	9.65757	11.0329	9.26681	0	0	0.994272	Encodes a member of the Rubisco small subunit (RBCS) multigene family: RBCS1A (At1g67090), RBCS1B (At5g38430), RBCS2B (At5g38420), and RBCS3B (At5g38410).	RUBISCO SMALL SUBUNIT 2B (RBCS2B)	#N/A	.
ATCG00040:exon:1	17.942	3.23e-75	14650.5	11732.1	17729	791.142	907.635	740.236	Encodes a maturase located in the trnK intron in the chloroplast genome.	MATURASE K (MATK)	#N/A	.
ATCG00580:exon:1	17.7957	1.47e-74	10008.5	7026.59	9910.86	459.521	560.419	481.725	PSII cytochrome b559. There have been many speculations about the function of Cyt b559, but the most favored at present is that it plays a protective role by acting as an electron acceptor or electron donor under conditions when electron flow through PSII is not optimized.	PHOTOSYSTEM II REACTION CENTER PROTEIN E (PSBE)	#N/A	.
ATCG00020:exon:1	17.0722	5.93e-83	458635	339389	467318	24392.9	25761	23459.8	Encodes chlorophyll binding protein D1, a part of the photosystem II reaction center core	PHOTOSYSTEM II REACTION CENTER PROTEIN A (PSBA)	#N/A	.
ATCG01050:exon:1	16.4956	1.06e-79	6993.69	5750.91	7802.66	407.442	426.406	403.177	Represents a plastid-encoded subunit of a NAD(P)H dehydrogenase complex. Its mRNA is edited at four positions. Translation data is not available for this gene.	(NDHD)	#N/A	.
ATCG01000:exon:1	16.0822	7.81e-09	56.3359	49.6481	74.1345	2.2976	4.56863	3.47995	YCF1.1; LOCATED IN: endomembrane system; EXPRESSED IN: guard cell; CONTAINS InterPro DOMAIN/s: Ycf1 (InterPro:IPR008896); BEST Arabidopsis thaliana protein match is: Ycf1 protein (TAIR:ATCG01130.1).	(YCF1.1)	#N/A	.
ATCG01070:exon:1	14.6015	1.62e-33	902.983	638.53	1033.25	55.9084	72.5905	45.2394	NADH dehydrogenase ND4L	(NDHE)	#N/A	.
ATCG00560:exon:1	14.1625	9.08e-43	1883.23	1274.3	1998.54	111.817	116.754	131.244	PSII L protein	PHOTOSYSTEM II REACTION CENTER PROTEIN L (PSBL)	#N/A	.
ATCG00440:exon:1	14.1539	3.66e-44	653.496	564.058	745.978	49.7814	43.1482	44.7422	Encodes NADH dehydrogenase D3 subunit of the chloroplast NAD(P)H dehydrogenase complex	(NDHC)	#N/A	.
ATCG00470:exon:1	13.7377	6.06e-48	2726.66	1912.83	2707.45	174.618	203.558	151.626	ATPase epsilon subunit	ATP SYNTHASE EPSILON CHAIN (ATPE)	#N/A	.
ATCG01010:exon:1	12.6527	1.56e-50	1504.97	1111.57	1598.53	114.114	109.14	107.381	Chloroplast encoded NADH dehydrogenase unit.	(NDHF)	#N/A	.
ATCG00380:exon:1	12.5354	2.49e-51	2057.06	1501.86	2046.42	137.09	163.963	142.181	Chloroplast encoded ribosomal protein S4	CHLOROPLAST RIBOSOMAL PROTEIN S4 (RPS4)	#N/A	.
ATCG00200:exon:1	12.4843	2.26e-14	127.158	111.708	197.692	11.488	8.12202	14.4169	a chloroplast-encoded tRNA for cysteine	(TRNC)	#N/A	.
ATCG01060:exon:1	12.2634	3.17e-42	2717	2068.67	3166.16	208.316	241.122	192.889	Encodes the PsaC subunit of photosystem I.	(PSAC)	#N/A	.
ATCG00860:exon:1	11.4985	3.63e-22	197.98	227.554	262.56	16.8491	23.3508	18.394	Encodes an unknown protein. This gene is regulated by AtSIG6 transcriptionally.	(YCF2.1)	#N/A	.
ATCG00270:exon:1	11.1983	1.19e-57	13259.8	10459.2	13912.6	1132.72	1169.06	1038.52	PSII D2 protein	PHOTOSYSTEM II REACTION CENTER PROTEIN D (PSBD)	#N/A	.
ATCG00900:exon:1	10.3061	0.00254752	20.9247	19.3076	44.7896	0.765868	1.52288	4.97136	encodes a chloroplast ribosomal protein S7, a constituent of the small subunit of the ribosomal complex	(RPS7.1)	#N/A	.
ATCG01080:exon:1	10.0607	3.23e-38	1224.9	1106.05	1419.37	121.773	140.612	107.381	NADH dehydrogenase ND6	(NDHG)	#N/A	.
AT2G39570:exon:4	9.70725	0.00198896	28.9727	27.5823	27.8004	3.06347	3.55338	1.49141	Encodes a ACT domain-containing protein. The ACT domain, named after bacterial aspartate kinase, chorismate mutase and TyrA (prephenate dehydrogenase), is a regulatory domain that serves as an amino acid-binding site in feedback-regulated amino acid metabolic enzymes.	ACT DOMAIN REPEATS 9 (ACR9)	#N/A	.
ATCG00010:exon:1	9.6597	1.6e-17	465.173	329.608	628.599	58.9719	48.2245	38.2795	A chloroplast gene encoding a histidine-accepting tRNA.	TRNAHIS (TRNH)	#N/A	.
ATCG00090:exon:1	9.65615	6.33e-38	825.723	703.348	884.981	84.2455	90.8651	73.079	tRNA-Ser	(TRNS.1)	#N/A	.
ATCG00640:exon:1	8.7857	2.86e-25	4180.12	2814.77	4020.25	346.938	463.97	429.526	encodes a chloroplast ribosomal protein L33, a constituent of the large subunit of the ribosomal complex	RIBOSOMAL PROTEIN L33 (RPL33)	#N/A	.
AT1G07017:exon:2	8.63851	7.36e-10	106.233	139.291	166.803	19.9126	12.183	14.9141	.	.	#N/A	.
ATCG00550:exon:1	8.63743	4.23e-37	3405.9	2496.2	3697.46	379.105	369.044	355.949	PSII component	PHOTOSYSTEM II REACTION CENTER PROTEIN J (PSBJ)	#N/A	.
ATCG00650:exon:1	7.96633	3.6e-28	1261.92	929.523	1221.67	134.027	163.963	126.77	chloroplast-encoded ribosomal protein S18	RIBOSOMAL PROTEIN S18 (RPS18)	#N/A	.
ATCG00260:exon:1	7.77429	0.0171145	16.096	20.6867	29.3449	2.2976	2.53813	2.98282	tRNA-Thr	(TRNT.1)	#N/A	.
ATCG00220:exon:1	7.39948	8.81e-15	334.796	234.449	261.015	51.3132	36.5491	23.8625	PSII low MW protein	PHOTOSYSTEM II REACTION CENTER PROTEIN M (PSBM)	#N/A	.
ATCG01030:exon:1	6.9009	0.0064379	24.1439	28.9614	32.4338	3.06347	2.53813	5.96563	tRNA-Leu	(TRNL.3)	#N/A	.
ATCG00600:exon:1	6.44688	6.87e-12	218.905	140.67	171.436	32.9323	28.4271	20.3826	Cytochrome b6-f complex, subunit V. Disruption of homologous gene in Chlamydomonas results in disruption of cytochrome b6-f complex.	(PETG)	#N/A	.
ATCG00210:exon:1	6.30747	2.54e-18	608.427	441.317	580.72	79.6503	88.3269	87.9931	YCF6; FUNCTIONS IN: electron transporter, transferring electrons within cytochrome b6/f complex of photosystem II activity; INVOLVED IN: cytochrome complex assembly; LOCATED IN: endomembrane system, cytochrome b6f complex; EXPRESSED IN: 22 plant structures; EXPRESSED DURING: 13 growth stages; CONTAINS InterPro DOMAIN/s: Cytochrome b6-f complex, subunit 8 (InterPro:IPR005497).	(YCF6)	#N/A	.
ATCG00250:exon:1	5.54395	1.93e-06	130.377	79.9886	105.024	22.976	16.7517	16.4055	this chloroplast gene encodes a UUC tRNA whose expression is regulated by SIG2.	(TRNE)	#N/A	.
ATCG00300:exon:1	4.9959	5.25e-14	598.77	448.212	684.2	94.2018	138.582	110.364	encodes PsbZ, which is a subunit of photosystem II. In Chlamydomonas, this protein has been shown to be essential in the interaction between PS II and the light harvesting complex II.	(YCF9)	#N/A	.
ATCG01040:exon:1	4.79687	2.5e-12	321.919	239.966	330.516	70.4599	60.9151	53.6907	YCF5; INVOLVED IN: respiratory chain complex IV assembly, protein complex assembly; LOCATED IN: endomembrane system, membrane; EXPRESSED IN: 23 plant structures; EXPRESSED DURING: 13 growth stages; CONTAINS InterPro DOMAIN/s: Cytochrome c assembly protein (InterPro:IPR002541), Cytochrome c-type biogenesis protein CcsA (InterPro:IPR017562).	(YCF5)	#N/A	.
AT2G34430:exon:1	4.37219	7.78e-20	1902.54	1667.35	1944.49	387.529	435.543	432.508	Photosystem II type I chlorophyll a/b-binding protein The mRNA is cell-to-cell mobile.	LIGHT-HARVESTING CHLOROPHYLL-PROTEIN COMPLEX II SUBUNIT B1 (LHB1B1)	#N/A	.
ATCG00080:exon:1	4.07753	1.47e-09	545.653	370.982	554.464	117.944	117.262	122.793	PSII I protein	PHOTOSYSTEM II REACTION CENTER PROTEIN I (PSBI)	#N/A	.
ATCG00630:exon:1	4.01388	1.54e-11	663.153	558.541	715.089	150.876	164.471	164.055	Encodes subunit J of photosystem I.	(PSAJ)	#N/A	.
ATCG01120:exon:1	3.91146	0.0109404	53.1167	33.0987	46.3341	7.65868	10.6601	14.4169	encodes a chloroplast ribosomal protein S15, a constituent of the small subunit of the ribosomal complex	CHLOROPLAST RIBOSOMAL PROTEIN S15 (RPS15)	#N/A	.
ATCG00510:exon:1	3.73996	4.96e-11	392.741	318.575	403.106	92.6701	96.9566	106.387	Encodes subunit I of photosystem I.	PHOTSYSTEM I SUBUNIT I (PSAI)	#N/A	.
ATCG00070:exon:1	2.71579	5.47e-06	428.152	413.734	577.631	164.662	174.623	180.958	PSII K protein	PHOTOSYSTEM II REACTION CENTER PROTEIN K PRECURSOR (PSBK)	#N/A	.
