# Supplementary material for: Arabidopsis Mitochondrial Transcription Termination Factor mTERF2 Promotes Splicing of Group IIB Introns
Source: Cells. 2021 Feb 3;10(2):315. doi: 10.3390/cells10020315 (PMC7913559; doi:10.3390/cells10020315)
Supplement: Supplementary file 1 [file cells-10-00315-s001.zip › Supplementary Table S3.xlsx]

## Sheet: Sheet1
Supplementary Table S3. Transcript level changes of plastid-encoded genes in 6-d-old LD-grown amiR1-3-mterf2 seedlings compared to Col-0.

## Sheet: plastid-encoded
Locus Identifier	Base mean	log2(FC)	Fold change	StdErr	Wald-Stats	p-value	p-adj	Locus Identifier	Locus Identifier	Gene Model Name	Gene Model Description	Gene Model Type	Primary Gene Symbol	Locus Identifier	Col_1_exon	Col_2_exon	Col_3_exon	mterf2_1_exon	mterf2_2_exon	mterf2_3_exon
ATCG00210	23454.3	-1.10131	0.466092	0.151484	-7.27016	3.59049e-13	6.24231e-12	ATCG00210	ATCG00210.1	YCF6; FUNCTIONS IN: electron transporter, transferring electrons within cytochrome b6/f complex of photosystem II activity; INVOLVED IN: cytochrome complex assembly; LOCATED IN: endomembrane system, cytochrome b6f complex; EXPRESSED IN: 22 plant structures; EXPRESSED DURING: 13 growth stages; CONTAINS InterPro DOMAIN/s: Cytochrome b6-f complex, subunit 8 (InterPro:IPR005497).	protein_coding	(YCF6)	(YCF6)	ATCG00210	28154.4	45401.1	27172.7	15702.3	13938.5	16556.9
ATCG00630	48191.8	-0.672157	0.627568	0.108218	-6.21116	5.25963e-10	6.55344e-09	ATCG00630	ATCG00630.1	Encodes subunit J of photosystem I.	protein_coding	(PSAJ)	(PSAJ)	ATCG00630	60722.5	75227.7	58118.1	39624.8	39423.4	42144.3
ATCG00990	0.916498	-0.370014	0.773775	0.389826	-0.949177	0.342531	NA	ATCG00990	ATCG00990.1	tRNA-Asn	pre_trna	(TRNN.1)	(TRNN.1)	ATCG00990	1.99358	3.48631	0	0	1.03547	0
ATCG00280	32295.7	-0.329692	0.795706	0.122909	-2.68241	0.00730947	0.0246	ATCG00280	ATCG00280.1	chloroplast gene encoding a CP43 subunit of the photosystem II reaction center. promoter contains a blue-light responsive element.	protein_coding	PHOTOSYSTEM II REACTION CENTER PROTEIN C (PSBC)	PHOTOSYSTEM II REACTION CENTER PROTEIN C (PSBC)	ATCG00280	40901.3	34384.3	34808.5	23069.3	32992.1	31265.2
ATCG00390	1633.9	-0.246054	0.8432	0.0937559	-2.62441	0.00868003	0.0284542	ATCG00390	ATCG00390.1	tRNA-Thr	pre_trna	(TRNT.2)	(TRNT.2)	ATCG00390	1936.77	2196.38	1930.55	1784.26	1551.13	1771.02
ATCG00270	76826.7	-0.237552	0.848183	0.150426	-1.57919	0.114292	0.228721	ATCG00270	ATCG00270.1	PSII D2 protein	protein_coding	PHOTOSYSTEM II REACTION CENTER PROTEIN D (PSBD)	PHOTOSYSTEM II REACTION CENTER PROTEIN D (PSBD)	ATCG00270	93711.4	66424.7	87179.6	57053.2	83626.6	68371.2
ATCG00020	6.73731e+06	-0.156413	0.897253	0.0562934	-2.77853	0.00546062	0.0192414	ATCG00020	ATCG00020.1	Encodes chlorophyll binding protein D1, a part of the photosystem II reaction center core	protein_coding	PHOTOSYSTEM II REACTION CENTER PROTEIN A (PSBA)	PHOTOSYSTEM II REACTION CENTER PROTEIN A (PSBA)	ATCG00020	7.43071e+06	7.822e+06	7.60361e+06	6.88098e+06	6.74149e+06	6.87919e+06
ATCG00970	0.607405	-0.154028	0.898738	0.299995	-0.513435	0.607647	NA	ATCG00970	ATCG00970.1	chloroplast-encoded 5S ribosomal RNA	ribosomal_rna	RIBOSOMAL RNA5S (RRN5S)	RIBOSOMAL RNA5S (RRN5S)	ATCG00970	0	3.48631	0	0	0	1.13965
ATCG00150	21095	-0.148048	0.902471	0.105229	-1.4069	0.159456	0.294494	ATCG00150	ATCG00150.1	Encodes a subunit of ATPase complex CF0, which is a proton channel that supplies the proton motive force to drive ATP synthesis by CF1 portion of the complex.	protein_coding	(ATPI)	(ATPI)	ATCG00150	21653.3	28462.3	21248	20717.5	22381.7	21234
ATCG01150	0.221509	-0.115311	0.923184	0.260071	-0.443381	0.65749	NA	ATCG01150	ATCG01150.1	tRNA-Arg	pre_trna	(TRNR.3)	(TRNR.3)	ATCG01150	1.99358	0	0	0	0	0
ATCG01180	17.0418	-0.113404	0.924405	0.441679	-0.256756	0.797367	0.874651	ATCG01180	ATCG01180.1	chloroplast-encoded 23S ribosomal RNA	ribosomal_rna	RIBOSOMAL RNA23S (RRN23S.2)	RIBOSOMAL RNA23S (RRN23S.2)	ATCG01180	14.9519	12.7831	28.7993	11.1285	21.7449	18.2344
ATCG00710	34803.1	-0.0647418	0.956116	0.0990316	-0.653749	0.513274	0.666907	ATCG00710	ATCG00710.1	Encodes a 8 kD phosphoprotein that is a component of the photosystem II oxygen evolving core. Its exact molecular function has not been determined but it may play a role in mediating electron transfer between the secondary quinone acceptors, QA and QB, associated with the acceptor side of PSII.	protein_coding	PHOTOSYSTEM II REACTION CENTER PROTEIN H (PSBH)	PHOTOSYSTEM II REACTION CENTER PROTEIN H (PSBH)	ATCG00710	36158.6	43584.7	34096.4	35352.7	39738.2	33705.2
ATCG00850	0.129123	-0.0540113	0.963254	0.260071	-0.207679	0.83548	NA	ATCG00850	ATCG00850.1	tRNA-Ile	pre_trna	(TRNI.1)	(TRNI.1)	ATCG00850	0	1.1621	0	0	0	0
ATCG00910	0.129123	-0.0540113	0.963254	0.260071	-0.207679	0.83548	NA	ATCG00910	ATCG00910.1	tRNA-Val	pre_trna	(TRNV.2)	(TRNV.2)	ATCG00910	0	1.1621	0	0	0	0
ATCG01160	0.110342	-0.0540113	0.963254	0.260071	-0.207679	0.83548	NA	ATCG01160	ATCG01160.1	Chloroplast-encoded 5S ribosomal RNA, which is a component of the 50S large subunit of the plastidic ribosome.	ribosomal_rna	RIBOSOMAL RNA5S (RRN5S)	RIBOSOMAL RNA5S (RRN5S)	ATCG01160	0	0	0.993081	0	0	0
ATCG01260	0.110755	-0.0540113	0.963254	0.260071	-0.207679	0.83548	NA	ATCG01260	ATCG01260.1	tRNA-Leu	pre_trna	(TRNL.4)	(TRNL.4)	ATCG01260	0.996792	0	0	0	0	0
ATCG00070	30985.2	-0.0209444	0.985587	0.241521	-0.0867186	0.930895	0.961431	ATCG00070	ATCG00070.1	PSII K protein	protein_coding	PHOTOSYSTEM II REACTION CENTER PROTEIN K PRECURSOR (PSBK)	PHOTOSYSTEM II REACTION CENTER PROTEIN K PRECURSOR (PSBK)	ATCG00070	27334	48965.3	26611.6	33530.1	32176.2	35635.8
ATCG00490	1.53507e+06	-0.0147618	0.98982	0.275438	-0.0535939	0.957259	0.975925	ATCG00490	ATCG00490.1	large subunit of RUBISCO. Protein is tyrosine-phosphorylated and its phosphorylation state is modulated in response to ABA in Arabidopsis thaliana seeds.	protein_coding	(RBCL)	(RBCL)	ATCG00490	1.27425e+06	2.5592e+06	1.28081e+06	1.66164e+06	1.73606e+06	1.66049e+06
ATCG00430	17555.5	-0.010325	0.992869	0.060928	-0.169462	0.865433	0.921828	ATCG00430	ATCG00430.1	Encodes a protein which was originally thought to be part of photosystem II but its wheat homolog was later shown to encode for subunit K of NADH dehydrogenase.	protein_coding	PHOTOSYSTEM II REACTION CENTER PROTEIN G (PSBG)	PHOTOSYSTEM II REACTION CENTER PROTEIN G (PSBG); (NDHK)	ATCG00430	19652.7	18420.5	19391.9	19458.7	18564.9	19034.5
ATCG00080	26708	0.0516745	1.03647	0.119693	0.431725	0.665941	0.784659	ATCG00080	ATCG00080.1	PSII I protein	protein_coding	PHOTOSYSTEM II REACTION CENTER PROTEIN I (PSBI)	PHOTOSYSTEM II REACTION CENTER PROTEIN I (PSBI)	ATCG00080	25626.5	37095.5	26094.2	30321.4	30222.3	31550.1
ATCG00440	8481.88	0.0667265	1.04734	0.0621096	1.07433	0.282673	0.445524	ATCG00440	ATCG00440.1	Encodes NADH dehydrogenase D3 subunit of the chloroplast NAD(P)H dehydrogenase complex	protein_coding	(NDHC)	(NDHC)	ATCG00440	8848.52	9089.98	8986.39	9481.45	9686.82	9034.02
ATCG00420	14568.3	0.0673659	1.0478	0.05562	1.21118	0.225826	0.379771	ATCG00420	ATCG00420.1	Encodes NADH dehydrogenase subunit J. Its transcription is increased upon sulfur depletion.	protein_coding	NADH DEHYDROGENASE SUBUNIT J (NDHJ)	NADH DEHYDROGENASE SUBUNIT J (NDHJ)	ATCG00420	15702.5	15589.6	15645	16368.7	16355.2	16463.4
ATCG00700	6466.33	0.120605	1.08719	0.107775	1.11904	0.263122	0.423746	ATCG00700	ATCG00700.1	PSII low MW protein	protein_coding	PHOTOSYSTEM II REACTION CENTER PROTEIN N (PSBN)	PHOTOSYSTEM II REACTION CENTER PROTEIN N (PSBN)	ATCG00700	6498.08	7965.06	6213.71	7210.01	8437.01	6847.03
ATCG01290	0.786278	0.156235	1.11438	0.328229	0.475994	0.634079	NA	ATCG01290	ATCG01290.1	tRNA-Ile	pre_trna	(TRNI.4)	(TRNI.4)	ATCG01290	0	2.32421	0	2.47299	0	2.2793
ATCG00220	29413.4	0.159755	1.1171	0.105113	1.51984	0.128551	0.250214	ATCG00220	ATCG00220.1	PSII low MW protein	protein_coding	PHOTOSYSTEM II REACTION CENTER PROTEIN M (PSBM)	PHOTOSYSTEM II REACTION CENTER PROTEIN M (PSBM)	ATCG00220	28253.1	35044.4	27431.9	34024.7	30375.5	37062.6
ATCG00680	314043	0.16187	1.11874	0.122866	1.31745	0.187688	0.332059	ATCG00680	ATCG00680.1	encodes for CP47, subunit of the photosystem II reaction center.	protein_coding	PHOTOSYSTEM II REACTION CENTER PROTEIN B (PSBB)	PHOTOSYSTEM II REACTION CENTER PROTEIN B (PSBB)	ATCG00680	274026	390201	276956	347939	382977	323632
ATCG00290	2888.81	0.177871	1.13121	0.142843	1.24522	0.213049	0.365369	ATCG00290	ATCG00290.1	tRNA-Ser	pre_trna	(TRNS.2)	(TRNS.2)	ATCG00290	2992.37	2153.38	2909.73	2433.42	3417.05	3283.34
ATCG00570	1925.73	0.255505	1.19375	0.10238	2.49567	0.012572	0.0388753	ATCG00570	ATCG00570.1	PSII cytochrome b559	protein_coding	PHOTOSYSTEM II REACTION CENTER PROTEIN F (PSBF)	PHOTOSYSTEM II REACTION CENTER PROTEIN F (PSBF)	ATCG00570	1749.37	1961.63	1887.85	2362.94	1911.48	2421.76
ATCG00300	9333.29	0.25909	1.19672	0.122692	2.11171	0.034711	0.089967	ATCG00300	ATCG00300.1	encodes PsbZ, which is a subunit of photosystem II. In Chlamydomonas, this protein has been shown to be essential in the interaction between PS II and the light harvesting complex II.	protein_coding	(YCF9)	(YCF9)	ATCG00300	9817.4	8521.71	8863.25	9106.79	12342.8	11182.3
ATCG01140	2.77906	0.283285	1.21696	0.496621	0.570425	0.568389	0.711038	ATCG01140	ATCG01140.1	tRNA-Asn	pre_trna	(TRNN.2)	(TRNN.2)	ATCG01140	2.99037	3.48631	0	8.65547	3.10641	0
ATCG00690	19564.3	0.28823	1.22114	0.0841405	3.42558	0.000613484	0.00283115	ATCG00690	ATCG00690.1	Encodes photosystem II 5 kD protein subunit PSII-T. This is a plastid-encoded gene (PsbTc) which also has a nuclear-encoded paralog (PsbTn).	protein_coding	PHOTOSYSTEM II REACTION CENTER PROTEIN T (PSBT)	PHOTOSYSTEM II REACTION CENTER PROTEIN T (PSBT); (PSBTC)	ATCG00690	17499.7	20391.4	17895.3	22158	24683.5	21361.6
ATCG00510	42782.5	0.341069	1.26669	0.0908973	3.75224	0.000175259	0.000922119	ATCG00510	ATCG00510.1	Encodes subunit I of photosystem I.	protein_coding	PHOTSYSTEM I SUBUNIT I (PSAI)	PHOTSYSTEM I SUBUNIT I (PSAI)	ATCG00510	44039.2	40369.2	44403.6	53821	50750.4	58882.4
ATCG00560	31759.4	0.341739	1.26728	0.132264	2.58377	0.00977267	0.0314722	ATCG00560	ATCG00560.1	PSII L protein	protein_coding	PHOTOSYSTEM II REACTION CENTER PROTEIN L (PSBL)	PHOTOSYSTEM II REACTION CENTER PROTEIN L (PSBL)	ATCG00560	26647.2	39525.5	25533.1	39125.2	36865.8	40660.5
ATCG00590	13320	0.357612	1.2813	0.12553	2.8488	0.0043884	0.0159769	ATCG00590	ATCG00590.1	electron carriers; FUNCTIONS IN: electron carrier activity; LOCATED IN: endomembrane system, cytochrome b6f complex; EXPRESSED IN: 22 plant structures; EXPRESSED DURING: 13 growth stages; CONTAINS InterPro DOMAIN/s: Cytochrome b6/f complex subunit VI (InterPro:IPR007802).	protein_coding	(ORF31)	(ORF31)	ATCG00590	11849.9	16943.5	11679.6	17027.8	16361.5	18648.1
ATCG00720	131974	0.366938	1.28961	0.0948104	3.87023	0.000108734	0.00060435	ATCG00720	ATCG00720.1	Encodes the cytochrome b(6) subunit of the cytochrome b6f complex.	protein_coding	PHOTOSYNTHETIC ELECTRON TRANSFER B (PETB)	PHOTOSYNTHETIC ELECTRON TRANSFER B (PETB)	ATCG00720	117446	148036	117837	161331	168906	165104
ATCG00840	5.73117	0.373711	1.29568	0.529186	0.7062	0.480064	0.637399	ATCG00840	ATCG00840.1	One of two chloroplast genes that encode chloroplast ribosomal protein L23, a constituent of the large subunit of the ribosomal complex	protein_coding	RIBOSOMAL PROTEIN L23.1 (RPL23.1)	RIBOSOMAL PROTEIN L23 (RPL23);RIBOSOMAL PROTEIN L23.1 (RPL23.1)	ATCG00840	4.98396	6.97263	4.9654	4.94598	4.14188	17.0948
ATCG00550	44110.9	0.381585	1.30277	0.0959413	3.97728	6.9709e-05	0.00040333	ATCG00550	ATCG00550.1	PSII component	protein_coding	PHOTOSYSTEM II REACTION CENTER PROTEIN J (PSBJ)	PHOTOSYSTEM II REACTION CENTER PROTEIN J (PSBJ)	ATCG00550	39486.9	48128.6	37839.4	55855	52461	55476
ATCG00950	37.7657	0.402588	1.32188	0.320957	1.25434	0.209719	0.361007	ATCG00950	ATCG00950.1	chloroplast-encoded 23S ribosomal RNA	ribosomal_rna	RIBOSOMAL RNA23S (RRN23S.1)	RIBOSOMAL RNA23S (RRN23S.1)	ATCG00950	33.8909	34.8631	36.744	46.9869	45.5607	51.2843
ATCG00580	77134.2	0.414938	1.33324	0.125072	3.31758	0.000908008	0.00402517	ATCG00580	ATCG00580.1	PSII cytochrome b559. There have been many speculations about the function of Cyt b559, but the most favored at present is that it plays a protective role by acting as an electron acceptor or electron donor under conditions when electron flow through PSII is not optimized.	protein_coding	PHOTOSYSTEM II REACTION CENTER PROTEIN E (PSBE)	PHOTOSYSTEM II REACTION CENTER PROTEIN E (PSBE)	ATCG00580	62848.7	91078.8	61357.5	96454.1	92112.3	99628.4
ATCG00980	0.769591	0.421289	1.33912	0.324378	1.29876	0.194027	NA	ATCG00980	ATCG00980.1	tRNA-Arg	pre_trna	(TRNR.2)	(TRNR.2)	ATCG00980	0	0	0	4.94598	0	1.13965
ATCG00500	24524	0.462845	1.37826	0.0694899	6.66062	2.72683e-11	3.91753e-10	ATCG00500	ATCG00500.1	Encodes the carboxytransferase beta subunit of the Acetyl-CoA carboxylase (ACCase) complex in plastids. This complex catalyzes the carboxylation of acetyl-CoA to produce malonyl-CoA, the first committed step in fatty acid synthesis.	protein_coding	ACETYL-COA CARBOXYLASE CARBOXYL TRANSFERASE SUBUNIT BETA (ACCD)	ACETYL-COA CARBOXYLASE CARBOXYL TRANSFERASE SUBUNIT BETA (ACCD)	ATCG00500	23198.3	20477.4	22971.9	30616.9	30834.2	30538.1
ATCG00620	9981.65	0.463183	1.37858	0.124721	3.71376	0.000204204	0.00105665	ATCG00620	ATCG00620.1	tRNA-Pro	pre_trna	(TRNP)	(TRNP)	ATCG00620	8294.3	11761.7	8021.11	12889.2	12251.7	13736.2
ATCG01040	9888.82	0.468177	1.38336	0.10623	4.40718	1.04726e-05	7.15389e-05	ATCG01040	ATCG01040.1	YCF5; INVOLVED IN: respiratory chain complex IV assembly, protein complex assembly; LOCATED IN: endomembrane system, membrane; EXPRESSED IN: 23 plant structures; EXPRESSED DURING: 13 growth stages; CONTAINS InterPro DOMAIN/s: Cytochrome c assembly protein (InterPro:IPR002541), Cytochrome c-type biogenesis protein CcsA (InterPro:IPR017562).	protein_coding	(YCF5)	(YCF5)	ATCG01040	8966.14	11357.2	8302.16	13245.3	12619.3	13860.5
ATCG00200	1729.19	0.484923	1.39951	0.132735	3.65333	0.00025886	0.00130689	ATCG00200	ATCG00200.1	a chloroplast-encoded tRNA for cysteine	pre_trna	(TRNC)	(TRNC)	ATCG00200	1505.16	2024.39	1356.55	2105.75	2236.61	2527.75
ATCG00090	7061.13	0.48943	1.40389	0.0900962	5.4323	5.56315e-08	5.41348e-07	ATCG00090	ATCG00090.1	tRNA-Ser	pre_trna	(TRNS.1)	(TRNS.1)	ATCG00090	5422.55	6053.4	6264.35	8623.32	8411.12	7931.98
ATCG00600	11802.7	0.588416	1.5036	0.120551	4.88107	1.05513e-06	8.51399e-06	ATCG00600	ATCG00600.1	Cytochrome b6-f complex, subunit V. Disruption of homologous gene in Chlamydomonas results in disruption of cytochrome b6-f complex.	protein_coding	(PETG)	(PETG)	ATCG00600	9458.56	13165.5	9129.39	15913.7	15367.4	16714.1
ATCG00140	93116.6	0.640935	1.55934	0.15219	4.21141	2.53784e-05	0.000160797	ATCG00140	ATCG00140.1	ATPase III subunit	protein_coding	(ATPH)	(ATPH)	ATCG00140	71784.9	118158	68626.8	133428	133941	139643
ATCG00410	4693.01	0.652833	1.57225	0.109829	5.9441	2.77978e-09	3.19616e-08	ATCG00410	ATCG00410.1	chloroplast TRNF	pre_trna	(TRNF)	(TRNF)	ATCG00410	3945.3	4995.89	3571.12	6461.93	6463.4	6837.91
ATCG00870	4.61646	0.656468	1.57622	0.529634	1.23947	0.21517	0.367518	ATCG00870	ATCG00870.1	Protein precursor Ycf15, putative, chloroplast; CONTAINS InterPro DOMAIN/s: Protein precursor Ycf15, putative, chloroplast (InterPro:IPR019645); BEST Arabidopsis thaliana protein match is: Protein precursor Ycf15, putative, chloroplast (TAIR:ATCG01270.1).	protein_coding	(ORF77.1)	(ORF77.1)	ATCG00870	0.996792	8.13473	0.993081	11.1285	6.21282	7.97757
ATCG00610	7656.59	0.672625	1.59397	0.115699	5.81356	6.11597e-09	6.77937e-08	ATCG00610	ATCG00610.1	tRNA-Trp	pre_trna	(TRNW)	(TRNW)	ATCG00610	6208.02	8144.03	5696.31	10560.9	10194.2	11376
ATCG00480	97144.2	0.680045	1.60219	0.1042	6.52633	6.74027e-11	9.31175e-10	ATCG00480	ATCG00480.1	chloroplast-encoded gene for beta subunit of ATP synthase	protein_coding	ATP SYNTHASE SUBUNIT BETA (PB)	ATP SYNTHASE SUBUNIT BETA (ATPB);ATP SYNTHASE SUBUNIT BETA (PB); (CF1BETA); (ATHCF1BETA)	ATCG00480	77064.9	102399	77325.2	137404	142597	133312
ATCG00730	80515.1	0.698845	1.62321	0.125779	5.55613	2.75821e-08	2.80669e-07	ATCG00730	ATCG00730.1	A chloroplast gene encoding subunit IV of the cytochrome b6/f complex	protein_coding	PHOTOSYNTHETIC ELECTRON TRANSFER D (PETD)	PHOTOSYNTHETIC ELECTRON TRANSFER D (PETD)	ATCG00730	61630.6	89360	60006.9	111599	117097	116175
ATCG00470	34642.1	0.701343	1.62602	0.087085	8.05355	8.04247e-16	1.72454e-14	ATCG00470	ATCG00470.1	ATPase epsilon subunit	protein_coding	ATP SYNTHASE EPSILON CHAIN (ATPE)	ATP SYNTHASE EPSILON CHAIN (ATPE)	ATCG00470	27420.7	34300.7	28502.4	48302.5	49648.7	49230.7
ATCG00320	401.395	0.714445	1.64085	0.151176	4.72592	2.29076e-06	1.74477e-05	ATCG00320	ATCG00320.1	tRNA-Phe	pre_trna	(TRNFM)	(TRNFM)	ATCG00320	364.826	310.282	402.198	586.099	608.856	592.619
ATCG01210	5.08363	0.720636	1.64791	0.530313	1.35889	0.174182	0.314606	ATCG01210	ATCG01210.1	chloroplast-encoded 16S ribosomal RNA	ribosomal_rna	RIBOSOMAL RNA 16S (RRN16S.2)	RIBOSOMAL RNA 16S (RRN16S.2)	ATCG01210	0.996792	6.97263	2.97924	4.94598	20.7094	3.41896
ATCG00130	78208.4	0.747174	1.6785	0.0863531	8.65254	5.03643e-18	1.25434e-16	ATCG00130	ATCG00130.1	ATPase F subunit.	protein_coding	(ATPF)	(ATPF)	ATCG00130	63869.4	77178.8	62819.3	111094	117470	114802
ATCG00450	20088.4	0.771495	1.70704	0.262591	2.93801	0.00330328	0.0124531	ATCG00450	ATCG00450.1	tRNA-Val	pre_trna	(TRNV.1)	(TRNV.1)	ATCG00450	13827.5	26110.2	13343	32329.4	29436.3	32575.8
ATCG01270	3.78538	0.77471	1.71085	0.531983	1.45627	0.145319	0.275669	ATCG01270	ATCG01270.1	Protein precursor Ycf15, putative, chloroplast; CONTAINS InterPro DOMAIN/s: Protein precursor Ycf15, putative, chloroplast (InterPro:IPR019645); BEST Arabidopsis thaliana protein match is: Protein precursor Ycf15, putative, chloroplast (TAIR:ATCG00870.1).	protein_coding	(ORF77.2)	(ORF77.2)	ATCG01270	0.996792	2.32421	4.9654	7.41898	9.31923	5.69826
ATCG01010	24863.7	0.790707	1.72992	0.104993	7.53101	5.03474e-14	9.43708e-13	ATCG01010	ATCG01010.1	Chloroplast encoded NADH dehydrogenase unit.	protein_coding	(NDHF)	(NDHF)	ATCG01010	19313.8	25926.6	19879.5	37840.5	36779.9	38637.6
ATCG00260	718.001	0.85789	1.81239	0.164672	5.20968	1.89162e-07	1.71549e-06	ATCG00260	ATCG00260.1	tRNA-Thr	pre_trna	(TRNT.1)	(TRNT.1)	ATCG00260	538.267	784.421	499.52	1081.93	1032.36	1233.1
ATCG00330	77141.6	0.884855	1.84658	0.115299	7.67445	1.66126e-14	3.22876e-13	ATCG00330	ATCG00330.1	30S chloroplast ribosomal protein S14	protein_coding	CHLOROPLAST RIBOSOMAL PROTEIN S14 (RPS14)	CHLOROPLAST RIBOSOMAL PROTEIN S14 (RPS14)	ATCG00330	59222.4	69755.3	59069.4	112316	136090	101395
ATCG00340	332290	0.899105	1.86491	0.129438	6.9462	3.75264e-12	5.81283e-11	ATCG00340	ATCG00340.1	Encodes the D1 subunit of photosystem I reaction center.	protein_coding	(PSAB)	(PSAB)	ATCG00340	244335	313494	241461	482520	599497	422764
ATCG01300	6.31064	0.907038	1.87519	0.528199	1.71723	0.0859372	0.184366	ATCG01300	ATCG01300.1	One of two chloroplast genes that encode chloroplast ribosomal protein L23, a constituent of the large subunit of the ribosomal complex	protein_coding	RIBOSOMAL PROTEIN L23 (RPL23.2)	RIBOSOMAL PROTEIN L23 (RPL23.2)	ATCG01300	4.98396	1.1621	5.95848	11.1285	18.6385	5.69826
ATCG00310	167.764	0.909288	1.87812	0.195233	4.65745	3.20155e-06	2.37319e-05	ATCG00310	ATCG00310.1	tRNA-Gly	pre_trna	(TRNG.2)	(TRNG.2)	ATCG00310	146.528	126.669	147.969	243.59	244.371	321.382
ATCG00350	308795	0.910147	1.87924	0.131103	6.94225	3.85907e-12	5.96912e-11	ATCG00350	ATCG00350.1	Encodes psaA protein comprising the reaction center for photosystem I along with psaB protein; hydrophobic protein encoded by the chloroplast genome.	protein_coding	(PSAA)	(PSAA)	ATCG00350	228354	288436	223433	447772	563888	393148
ATCG01000	858.703	0.920466	1.89273	0.52173	1.76426	0.0776886	0.170098	ATCG01000	ATCG01000.1	YCF1.1; LOCATED IN: endomembrane system; EXPRESSED IN: guard cell; CONTAINS InterPro DOMAIN/s: Ycf1 (InterPro:IPR008896); BEST Arabidopsis thaliana protein match is: Ycf1 protein (TAIR:ATCG01130.1).	protein_coding	(YCF1.1)	(YCF1.1)	ATCG01000	722.674	34.8631	705.087	1418.26	1363.71	1435.96
ATCG00920	7.50345	0.947373	1.92836	0.521786	1.81563	0.0694264	0.156094	ATCG00920	ATCG00920.1	chloroplast-encoded 16S ribosomal RNA	ribosomal_rna	RIBOSOMAL RNA16S (RRN16S.1)	RIBOSOMAL RNA16S (RRN16S.1)	ATCG00920	4.98396	4.64842	6.95157	7.41898	31.0641	6.83791
ATCG00010	684.29	0.953747	1.9369	0.153252	6.22339	4.86516e-10	6.07596e-09	ATCG00010	ATCG00010.1	A chloroplast gene encoding a histidine-accepting tRNA.	pre_trna	TRNAHIS (TRNH)	TRNAHIS (TRNH)	ATCG00010	456.531	562.459	578.966	1017.64	1252.92	866.136
ATCG01190	3.96775	0.955831	1.9397	0.531539	1.79823	0.0721398	0.160921	ATCG01190	ATCG01190.1	tRNA-Ala	pre_trna	(TRNA.2)	(TRNA.2)	ATCG01190	0.996792	4.64842	0.993081	7.41898	5.17735	11.3965
ATCG00240	450.024	0.968655	1.95701	0.140202	6.90898	4.88166e-12	7.46527e-11	ATCG00240	ATCG00240.1	tRNA-Tyr	pre_trna	(TRNY)	(TRNY)	ATCG00240	307.012	409.061	318.779	702.33	658.559	684.931
ATCG01060	50465.8	1.02538	2.0355	0.11525	8.89706	5.7348e-19	1.53637e-17	ATCG01060	ATCG01060.1	Encodes the PsaC subunit of photosystem I.	protein_coding	(PSAC)	(PSAC)	ATCG01060	35757.9	49896.1	35359.6	81396.1	81776.2	85246
ATCG01200	352.944	1.03551	2.04984	0.508929	2.03469	0.0418824	0.104672	ATCG01200	ATCG01200.1	tRNA-Ile	pre_trna	(TRNI.3)	(TRNI.3)	ATCG01200	14.9519	118.535	335.661	65.5343	2458.21	105.988
ATCG00460	353.281	1.07264	2.10328	0.134489	7.97572	1.51498e-15	3.1915e-14	ATCG00460	ATCG00460.1	Chloroplast encoded tRNA-Met gene.	pre_trna	(TRNM)	(TRNM)	ATCG00460	250.195	296.337	246.284	592.282	531.196	561.849
ATCG00060	234.941	1.09095	2.13014	0.196995	5.53796	3.06013e-08	3.09496e-07	ATCG00060	ATCG00060.1	tRNA-Gln	pre_trna	(TRNQ)	(TRNQ)	ATCG00060	195.371	111.562	188.685	330.144	409.011	348.734
ATCG01100	68321.9	1.09889	2.1419	0.0760872	14.4426	2.7929e-47	2.6567e-45	ATCG01100	ATCG01100.1	NADH dehydrogenase ND1	protein_coding	(NDHA)	(NDHA)	ATCG01100	49948.2	57777.5	50271.7	112370	113526	113841
ATCG01250	338.107	1.09914	2.14227	0.485123	2.2657	0.0234698	0.0652735	ATCG01250	ATCG01250.1	NADH dehydrogenase ND2	protein_coding	(NDHB.2)	(NDHB.2)	ATCG01250	262.156	135.966	294.945	725.823	625.424	627.948
ATCG01090	18767.2	1.10332	2.14848	0.0744754	14.8145	1.18032e-49	1.23124e-47	ATCG01090	ATCG01090.1	Encodes subunit of the chloroplast NAD(P)H dehydrogenase complex	protein_coding	(NDHI)	(NDHI)	ATCG01090	13824.5	15684.9	13661.8	30712.1	31436.9	30945
ATCG00890	1260.6	1.10634	2.15299	0.52278	2.11626	NA	NA	ATCG00890	ATCG00890.1	NADH dehydrogenase ND2	protein_coding	(NDHB.1)	(NDHB.1)	ATCG00890	602.062	326.551	603.793	1855.98	1962.22	1945.39
ATCG00100	28704.5	1.18004	2.26583	0.113718	10.3769	3.15888e-25	1.23568e-23	ATCG00100	ATCG00100.1	tRNA-Gly	pre_trna	(TRNG.1)	(TRNG.1)	ATCG00100	19827.2	26440.2	18721.6	49191.5	47851.1	51610.3
ATCG01050	99927.8	1.20655	2.30785	0.105621	11.4234	3.1958e-30	1.66683e-28	ATCG01050	ATCG01050.1	Represents a plastid-encoded subunit of a NAD(P)H dehydrogenase complex. Its mRNA is edited at four positions. Translation data is not available for this gene.	protein_coding	(NDHD)	(NDHD)	ATCG01050	65547	88436.2	67254.4	170047	169535	175286
ATCG01070	25715.9	1.22549	2.33835	0.119132	10.2868	8.07783e-25	3.09263e-23	ATCG01070	ATCG01070.1	NADH dehydrogenase ND4L	protein_coding	(NDHE)	(NDHE)	ATCG01070	16355.4	23655.8	17119.7	45019.6	43455.6	46567.3
ATCG01080	31138.7	1.2548	2.38634	0.114043	11.0029	3.70238e-28	1.70824e-26	ATCG01080	ATCG01080.1	NADH dehydrogenase ND6	protein_coding	(NDHG)	(NDHG)	ATCG01080	20421.3	27997.4	20137.7	54026.2	55100.4	56135.8
ATCG00530	49053.4	1.26496	2.4032	0.0683343	18.5113	1.67376e-76	3.47514e-74	ATCG00530	ATCG00530.1	YCF10; LOCATED IN: endomembrane system, integral to membrane; EXPRESSED IN: 22 plant structures; EXPRESSED DURING: 13 growth stages; CONTAINS InterPro DOMAIN/s: CemA (InterPro:IPR004282); BEST Arabidopsis thaliana protein match is: CemA-like proton extrusion protein-related (TAIR:AT4G31040.1).	protein_coding	(YCF10)	(YCF10)	ATCG00530	34257.7	37068.8	34711.2	83175.4	85695.5	86880.2
ATCG01230	39.9524	1.26761	2.40762	0.357542	3.54534	0.000392114	0.00190451	ATCG01230	ATCG01230.1	chloroplast gene encoding ribosomal protein s12. The gene is located in three distinct loci on the chloroplast genome and is transpliced to make one transcript.	protein_coding	RIBOSOMAL PROTEIN S12B (RPS12B)	RIBOSOMAL PROTEIN S12 (RPS12);RIBOSOMAL PROTEIN S12B (RPS12B)	ATCG01230	35.8845	27.8905	11.917	70.4803	66.2701	69.5188
ATCG00520	39032.4	1.27029	2.41211	0.0698574	18.1841	6.89929e-74	1.3923e-71	ATCG00520	ATCG00520.1	Encodes a protein required for photosystem I assembly and stability. In cyanobacteria, loss of function mutation in this gene increases PSII/PSI ratio without any influence on photoautotrophic growth.	protein_coding	(YCF4)	(YCF4)	ATCG00520	28581	25799.9	29429.9	66663.2	69170.4	67107.3
ATCG00250	42.6992	1.28674	2.43977	0.329862	3.90086	9.5853e-05	0.000538718	ATCG00250	ATCG00250.1	this chloroplast gene encodes a UUC tRNA whose expression is regulated by SIG2.	pre_trna	(TRNE)	(TRNE)	ATCG00250	20.9326	32.5389	30.7855	95.2102	55.9154	76.3567
ATCG00540	68037.1	1.31337	2.48522	0.0808714	16.2402	2.61869e-59	3.53409e-57	ATCG00540	ATCG00540.1	Encodes cytochrome f apoprotein; involved in photosynthetic electron transport chain; encoded by the chloroplast genome and is transcriptionally repressed by a nuclear gene HCF2.	protein_coding	PHOTOSYNTHETIC ELECTRON TRANSFER A (PETA)	PHOTOSYNTHETIC ELECTRON TRANSFER A (PETA)	ATCG00540	45195.5	54472.5	45844.6	120839	122173	120530
ATCG01030	56.7745	1.31365	2.4857	0.289674	4.53494	5.76197e-06	4.09675e-05	ATCG01030	ATCG01030.1	tRNA-Leu	pre_trna	(TRNL.3)	(TRNL.3)	ATCG01030	26.9134	31.3768	49.654	89.0277	95.2632	105.988
ATCG00360	20431.8	1.31439	2.48698	0.0815779	16.1121	2.09705e-58	2.7278e-56	ATCG00360	ATCG00360.1	Encodes a protein required for photosystem I assembly and stability. In Chlamydomonas reinhardtii, this protein seems to act as a PSI specific chaperone facilitating the assembly of the complex by interacting with PsaA and PsaD. A loss of function mutation in tobacco leads to a loss of photosystem I.	protein_coding	(YCF3)	(YCF3)	ATCG00360	13882.3	16060.3	13819.7	35766.9	38906.7	34740
ATCG01020	16531.9	1.33619	2.52484	0.155264	8.60597	7.56755e-18	1.85058e-16	ATCG01020	ATCG01020.1	encodes a chloroplast ribosomal protein L32, a constituent of the large subunit of the ribosomal complex	protein_coding	RIBOSOMAL PROTEIN L32 (RPL32)	RIBOSOMAL PROTEIN L32 (RPL32)	ATCG01020	13278.3	7416.55	12342	28312.1	25893	30942.7
ATCG00940	5.29467	1.3463	2.54259	0.531581	2.53263	0.0113209	0.0355566	ATCG00940	ATCG00940.1	tRNA-Ala	pre_trna	(TRNA.1)	(TRNA.1)	ATCG00940	0.996792	5.81052	0	7.41898	9.31923	21.6534
ATCG00120	83401.8	1.35193	2.55254	0.109439	12.3534	4.67132e-35	3.09411e-33	ATCG00120	ATCG00120.1	Encodes the ATPase alpha subunit, which is a subunit of ATP synthase and part of the CF1 portion which catalyzes the conversion of ADP to ATP using the proton motive force. This complex is located in the thylakoid membrane of the chloroplast.	protein_coding	ATP SYNTHASE SUBUNIT ALPHA (ATPA)	ATP SYNTHASE SUBUNIT ALPHA (ATPA)	ATCG00120	53548.6	68517.7	51608.4	139842	165056	142898
ATCG00230	215.374	1.39155	2.6236	0.195917	7.10275	1.22294e-12	2.00356e-11	ATCG00230	ATCG00230.1	tRNA-Asp	pre_trna	(TRND)	(TRND)	ATCG00230	112.637	156.884	130.094	352.401	392.443	337.337
ATCG00640	30427.3	1.39791	2.63519	0.0959953	14.5623	4.88164e-48	4.76965e-46	ATCG00640	ATCG00640.1	encodes a chloroplast ribosomal protein L33, a constituent of the large subunit of the ribosomal complex	protein_coding	RIBOSOMAL PROTEIN L33 (RPL33)	RIBOSOMAL PROTEIN L33 (RPL33)	ATCG00640	19421.5	24135.7	18844.7	53619.4	53750.2	58378.7
ATCG00670	65682.1	1.53519	2.89826	0.0740835	20.7224	2.17662e-95	6.52774e-93	ATCG00670	ATCG00670.1	Encodes the only ClpP (caseinolytic protease) encoded within the plastid genome. Contains a highly conserved catalytic triad of Ser-type proteases (Ser-His-Asp). Part of the 350 kDa chloroplast Clp complex. The name reflects nomenclature described in Adam et. al (2001).	protein_coding	PLASTID-ENCODED CLP P (PCLPP)	CASEINOLYTIC PROTEASE P 1 (CLPP1);PLASTID-ENCODED CLP P (PCLPP)	ATCG00670	40374	46136.7	39704.4	121953	120051	125692
ATCG00905	42.7631	1.54203	2.91203	0.325693	4.7346	2.19488e-06	1.6747e-05	ATCG00905	ATCG00905.1	chloroplast gene encoding ribosomal protein s12. The gene is located in three distinct loci on the chloroplast genome and is transpliced to make one transcript.	protein_coding	RIBOSOMAL PROTEIN S12C (RPS12C)	RIBOSOMAL PROTEIN S12C (RPS12C);RIBOSOMAL PROTEIN S12 (RPS12)	ATCG00905	21.9294	19.7558	31.7786	85.3182	77.6602	78.636
ATCG00110	3894.67	1.54578	2.91962	0.0774015	19.9709	9.85639e-89	2.5642e-86	ATCG00110	ATCG00110.1	tRNA-Arg	pre_trna	(TRNR.1)	(TRNR.1)	ATCG00110	2424.2	2565.93	2454.9	6809.38	7608.63	7435.09
ATCG00050	2877.15	1.54917	2.9265	0.0949099	16.3226	6.81828e-60	9.37752e-58	ATCG00050	ATCG00050.1	Homologous to the bacterial ribosomal protein S16	protein_coding	RIBOSOMAL PROTEIN S16 (RPS16)	RIBOSOMAL PROTEIN S16 (RPS16)	ATCG00050	1678.6	1999.98	1594.89	5132.7	5005.46	5417.91
ATCG00380	16770.1	1.56067	2.94991	0.0603933	25.8418	3.00673e-147	2.70518e-144	ATCG00380	ATCG00380.1	Chloroplast encoded ribosomal protein S4	protein_coding	CHLOROPLAST RIBOSOMAL PROTEIN S4 (RPS4)	CHLOROPLAST RIBOSOMAL PROTEIN S4 (RPS4)	ATCG00380	10570	10954	10502.8	31524.5	32595.6	30679.4
ATCG01280	60.489	1.5797	2.98909	0.283929	5.56374	2.64061e-08	2.69592e-07	ATCG01280	ATCG01280.1	YCF2.2; FUNCTIONS IN: nucleoside-triphosphatase activity, nucleotide binding, ATP binding; INVOLVED IN: biological_process unknown; LOCATED IN: chloroplast; CONTAINS InterPro DOMAIN/s: ATPase, AAA+ type, core (InterPro:IPR003593), ATPase, AAA-type, core (InterPro:IPR003959), Chloroplast Ycf2 (InterPro:IPR008543); BEST Arabidopsis thaliana protein match is: Chloroplast Ycf2;ATPase, AAA type, core …	protein_coding	(YCF2.2)	(YCF2.2)	ATCG01280	42.862	31.3768	35.7509	137.251	108.724	112.826
ATCG01110	13737.6	1.60095	3.03344	0.0755172	21.1999	9.57512e-100	3.13266e-97	ATCG01110	ATCG01110.1	Encodes the 49KDa plastid NAD(P)H dehydrogenase subunit H protein. Its transcription is regulated by an ndhF-specific plastid sigma factor, SIG4.	protein_coding	NAD(P)H DEHYDROGENASE SUBUNIT H (NDHH)	NAD(P)H DEHYDROGENASE SUBUNIT H (NDHH)	ATCG01110	9046.88	8091.73	8598.09	26384.4	27640.8	24490
ATCG00180	7554.52	1.62638	3.08738	0.105924	15.3543	3.31409e-53	3.76638e-51	ATCG00180	ATCG00180.1	RNA polymerase beta' subunit-1	protein_coding	(RPOC1)	(RPOC1)	ATCG00180	4972.99	4097.58	4714.15	12985.7	16353.2	13707.7
ATCG00860	83.2003	1.70331	3.25648	0.310613	5.48371	4.16494e-08	4.13678e-07	ATCG00860	ATCG00860.1	Encodes an unknown protein. This gene is regulated by AtSIG6 transcriptionally.	protein_coding	(YCF2.1)	(YCF2.1)	ATCG00860	25.9166	76.6989	37.7371	165.69	136.682	206.277
ATCG00370	5013.73	1.72096	3.29656	0.0770615	22.3323	1.79489e-110	6.92091e-108	ATCG00370	ATCG00370.1	tRNA-Ser	pre_trna	(TRNS.3)	(TRNS.3)	ATCG00370	2676.39	2830.89	3113.31	9637.25	9692	9268.79
ATCG01130	20516.1	1.74653	3.3555	0.0676128	25.8313	3.94516e-147	3.40752e-144	ATCG01130	ATCG01130.1	YCF1.2; FUNCTIONS IN: protein binding; LOCATED IN: chloroplast, membrane; EXPRESSED IN: cultured cell, leaf; CONTAINS InterPro DOMAIN/s: Ycf1 (InterPro:IPR008896); BEST Arabidopsis thaliana protein match is: Ycf1 protein (TAIR:ATCG01000.1).	protein_coding	(YCF1.2)	TRANSLOCON AT THE INNER ENVELOPE MEMBRANE OF CHLOROPLASTS 214 (TIC214); (YCF1.2)	ATCG01130	11784.1	12297.4	11646.9	39581.5	40410.2	40477
ATCG00030	8474.4	1.7493	3.36195	0.232789	7.51451	5.71224e-14	1.06515e-12	ATCG00030	ATCG00030.1	Lysine tRNA	pre_trna	TRNALYS (TRNK)	(TRNK-UUU); (TRNA LYS);TRNALYS (TRNK)	ATCG00030	3897.46	6802.96	3723.06	17370.3	17122.5	17156.3
ATCG00930	45.8443	1.76603	3.40117	0.422535	4.1796	2.92017e-05	0.000182399	ATCG00930	ATCG00930.1	tRNA-Ile	pre_trna	(TRNI.2)	(TRNI.2)	ATCG00930	7.97433	29.0526	34.7578	50.6963	173.959	90.0325
ATCG01240	59.5431	1.77178	3.41475	0.405023	4.37451	1.21707e-05	8.19464e-05	ATCG01240	ATCG01240.1	30S chloroplast ribosomal protein S7	protein_coding	RIBOSOMAL PROTEIN S7 (RPS7.2)	RIBOSOMAL PROTEIN S7 (RPS7.2)	ATCG01240	33.8909	4.64842	41.7094	84.0817	134.611	136.758
ATCG00740	20551.8	1.77622	3.42528	0.0792268	22.4195	2.54227e-111	1.03576e-108	ATCG00740	ATCG00740.1	RNA polymerase alpha subunit	protein_coding	RNA POLYMERASE SUBUNIT ALPHA (RPOA)	RNA POLYMERASE SUBUNIT ALPHA (RPOA)	ATCG00740	12378.2	10914.5	12254.6	40183.7	43951.5	38470.1
ATCG00650	13084.6	1.77932	3.43265	0.0736545	24.1577	6.19464e-129	4.18003e-126	ATCG00650	ATCG00650.1	chloroplast-encoded ribosomal protein S18	protein_coding	RIBOSOMAL PROTEIN S18 (RPS18)	RIBOSOMAL PROTEIN S18 (RPS18)	ATCG00650	7880.63	6795.99	7587.14	25235.7	25506.7	26147
ATCG00065	7244.42	1.79188	3.46265	0.0932112	19.2238	2.33825e-82	5.48802e-80	ATCG00065	ATCG00065.1	chloroplast gene encoding ribosomal protein s12. The gene is located in three distinct loci on the chloroplast genome and is transpliced to make one transcript.	protein_coding	RIBOSOMAL PROTEIN S12A (RPS12A)	RIBOSOMAL PROTEIN S12A (RPS12A);RIBOSOMAL PROTEIN S12 (RPS12)	ATCG00065	4312.12	3436.34	4377.5	13929.1	14371.3	14105.5
ATCG00160	2534.6	1.86176	3.63451	0.128007	14.5442	6.35723e-48	6.18341e-46	ATCG00160	ATCG00160.1	Chloroplast ribosomal protein S2	protein_coding	RIBOSOMAL PROTEIN S2 (RPS2)	RIBOSOMAL PROTEIN S2 (RPS2)	ATCG00160	1344.67	1633.92	1201.63	4814.92	6050.25	4607.61
ATCG01310	5132.02	1.93438	3.82214	0.340225	5.6856	1.30357e-08	1.3832e-07	ATCG01310	ATCG01310.1	encodes a chloroplast ribosomal protein L2, a constituent of the large subunit of the ribosomal complex	protein_coding	RIBOSOMAL PROTEIN L2 (RPL2.2)	RIBOSOMAL PROTEIN L2 (RPL2.2)	ATCG01310	2938.54	1023.81	2956.4	10473.1	11198.6	9715.54
ATCG00660	11276.2	1.96876	3.91431	0.0894608	22.0069	2.47189e-107	8.89592e-105	ATCG00660	ATCG00660.1	encodes a chloroplast ribosomal protein L20, a constituent of the large subunit of the ribosomal complex	protein_coding	RIBOSOMAL PROTEIN L20 (RPL20)	RIBOSOMAL PROTEIN L20 (RPL20)	ATCG00660	6438.28	5201.58	6184.91	23474.9	23715.4	23275.1
ATCG00750	8112.43	1.98351	3.95453	0.112797	17.5848	3.22144e-69	5.56485e-67	ATCG00750	ATCG00750.1	30S chloroplast ribosomal protein S11	protein_coding	RIBOSOMAL PROTEIN S11 (RPS11)	RIBOSOMAL PROTEIN S11 (RPS11)	ATCG00750	4377.91	3494.45	4706.21	16926.4	18607.4	15004.7
ATCG00190	6373.42	2.07263	4.20654	0.0880134	23.5491	1.28297e-122	7.2903e-120	ATCG00190	ATCG00190.1	Chloroplast DNA-dependent RNA polymerase B subunit. The transcription of this gene is regulated by a nuclear encoded RNA polymerase. This gene has been transferred to mitochondrial genome during crucifer evolution.	protein_coding	RNA POLYMERASE SUBUNIT BETA (RPOB)	RNA POLYMERASE SUBUNIT BETA (RPOB)	ATCG00190	3277.45	3187.65	3035.85	12173.3	15000.8	13182.4
ATCG00900	85.578	2.09754	4.2798	0.261438	8.02311	1.03104e-15	2.19342e-14	ATCG00900	ATCG00900.1	encodes a chloroplast ribosomal protein S7, a constituent of the small subunit of the ribosomal complex	protein_coding	(RPS7.1)	(RPS7.1);CHLOROPLAST RIBOSOMAL PROTEIN S7 (RPS7)	ATCG00900	41.8652	25.5663	42.7025	170.636	152.214	199.439
ATCG00760	4534.11	2.10996	4.31679	0.111335	18.9514	4.30179e-80	9.57613e-78	ATCG00760	ATCG00760.1	encodes a chloroplast ribosomal protein L36, a constituent of the large subunit of the ribosomal complex	protein_coding	RIBOSOMAL PROTEIN L36 (RPL36)	RIBOSOMAL PROTEIN L36 (RPL36)	ATCG00760	2391.3	1796.61	2410.21	9584.08	10413.7	8962.22
ATCG00040	74472	2.11514	4.33233	0.238998	8.85003	8.74943e-19	2.31812e-17	ATCG00040	ATCG00040.1	Encodes a maturase located in the trnK intron in the chloroplast genome.	protein_coding	MATURASE K (MATK)	MATURASE K (MATK)	ATCG00040	27514.4	49642.8	27418	160475	161887	168842
ATCG00830	324.421	2.17969	4.53057	0.239631	9.09605	9.36765e-20	2.62015e-18	ATCG00830	ATCG00830.1	encodes a chloroplast ribosomal protein L2, a constituent of the large subunit of the ribosomal complex	protein_coding	RIBOSOMAL PROTEIN L2 (RPL2.1)	RIBOSOMAL PROTEIN L2 (RPL2.1)	ATCG00830	168.458	73.2126	173.789	634.323	777.638	640.485
ATCG00770	9001.13	2.25234	4.76453	0.123903	18.1781	7.68941e-74	1.53738e-71	ATCG00770	ATCG00770.1	chloroplast 30S ribosomal protein S8	protein_coding	RIBOSOMAL PROTEIN S8 (RPS8)	RIBOSOMAL PROTEIN S8 (RPS8)	ATCG00770	4431.74	3116.76	4534.41	19405.6	21400.1	18033.9
ATCG00800	11385.7	2.2533	4.76772	0.129377	17.4166	6.17259e-68	1.03322e-65	ATCG00800	ATCG00800.1	encodes a chloroplast ribosomal protein S3, a constituent of the small subunit of the ribosomal complex	protein_coding	RESISTANCE TO PSEUDOMONAS SYRINGAE 3 (RPS3)	.	ATCG00800	5679.72	3802.41	5579.13	23111.4	26372.4	24054.6
ATCG00810	5899.63	2.28607	4.87725	0.127277	17.9613	3.91685e-72	7.41899e-70	ATCG00810	ATCG00810.1	encodes a chloroplast ribosomal protein L22, a constituent of the large subunit of the ribosomal complex	protein_coding	RIBOSOMAL PROTEIN L22 (RPL22)	RIBOSOMAL PROTEIN L22 (RPL22)	ATCG00810	2792.01	1941.88	2894.83	12137.4	13825.6	12129.3
ATCG00790	17782.6	2.34605	5.08431	0.11112	21.1127	6.07681e-99	1.92965e-96	ATCG00790	ATCG00790.1	chloroplast gene encoding a ribosomal protein L16, which is a constituent of 50S large ribosomal subunit	protein_coding	RIBOSOMAL PROTEIN L16 (RPL16)	RIBOSOMAL PROTEIN L16 (RPL16)	ATCG00790	8410.93	6040.62	8298.18	38734.5	40911.4	38140.7
ATCG00820	2848.75	2.35793	5.12634	0.166147	14.1918	1.03003e-45	9.50489e-44	ATCG00820	ATCG00820.1	Encodes a 6.8-kDa protein of the small ribosomal subunit.	protein_coding	RIBOSOMAL PROTEIN S19 (RPS19)	RIBOSOMAL PROTEIN S19 (RPS19)	ATCG00820	1325.73	766.989	1418.12	5858.52	7137.49	5774.62
ATCG00780	14872.2	2.41217	5.32274	0.114324	21.0995	8.03693e-99	2.51509e-96	ATCG00780	ATCG00780.1	encodes a chloroplast ribosomal protein L14, a constituent of the large subunit of the ribosomal complex	protein_coding	RIBOSOMAL PROTEIN L14 (RPL14)	RIBOSOMAL PROTEIN L14 (RPL14)	ATCG00780	6956.61	4823.9	6606.97	32246.6	34676.8	32905.2
ATCG00400	31080.9	2.44136	5.43153	0.109679	22.2591	9.20972e-110	3.48887e-107	ATCG00400	ATCG00400.1	tRNA-Leu	pre_trna	(TRNL.1)	(TRNL.1)	ATCG00400	11398.3	14734.3	10995.4	68965.6	63243.4	73153.1
ATCG01120	3395.82	2.46738	5.5304	0.0829467	29.7466	1.91818e-194	2.76128e-191	ATCG01120	ATCG01120.1	encodes a chloroplast ribosomal protein S15, a constituent of the small subunit of the ribosomal complex	protein_coding	CHLOROPLAST RIBOSOMAL PROTEIN S15 (RPS15)	CHLOROPLAST RIBOSOMAL PROTEIN S15 (RPS15)	ATCG01120	1440.36	1273.67	1404.22	7554.99	7626.23	7840.81
ATCG00170	12977	2.67629	6.3921	0.103721	25.8028	8.2394e-147	6.84282e-144	ATCG00170	ATCG00170.1	RNA polymerase beta' subunit-2	protein_coding	(RPOC2)	(RPOC2)	ATCG00170	4800.55	4718.14	4413.25	27045.9	35738.2	27864.5
ATCG00880	0	NA	#VALUE!	NA	NA	NA	NA	ATCG00880	ATCG00880.1	tRNA-Leu	pre_trna	(TRNL.2)	(TRNL.2)	ATCG00880	0	0	0	0	0	0
ATCG00960	0	NA	#VALUE!	NA	NA	NA	NA	ATCG00960	ATCG00960.1	Chloroplast-encoded 4.5S ribosomal RNA, which is a constituent of the 50S large subunit of plastidic ribosome.	ribosomal_rna	RIBOSOMAL RNA4.5S (RRN4.5S.1)	RIBOSOMAL RNA4.5S (RRN4.5S.1)	ATCG00960	0	0	0	0	0	0
ATCG01170	0	NA	#VALUE!	NA	NA	NA	NA	ATCG01170	ATCG01170.1	chloroplast-encoded 4.5S ribosomal RNA, which is part of the 50S large ribosomal subunit in plastids	ribosomal_rna	RIBOSOMAL RNA4.5S (RRN4.5S.2)	RIBOSOMAL RNA4.5S (RRN4.5S.2)	ATCG01170	0	0	0	0	0	0
ATCG01220	0	NA	#VALUE!	NA	NA	NA	NA	ATCG01220	ATCG01220.1	tRNA-Val	pre_trna	(TRNV.3)	(TRNV.3)	ATCG01220	0	0	0	0	0	0
